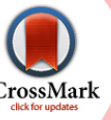

# *Leishmania donovani* Isolates with Antimony-Resistant but Not -Sensitive Phenotype Inhibit Sodium Antimony Gluconate-Induced Dendritic Cell Activation

Arun Kumar Haldar<sup>1,3</sup>, Vinod Yadav<sup>2,3</sup>, Eshu Singhal<sup>2</sup>, Kamlesh Kumar Bisht<sup>3\*</sup>, Alpana Singh<sup>2</sup>, Suniti Bhaumik<sup>1</sup>, Rajatava Basu<sup>1</sup>, Pradip Sen<sup>2\*</sup>, Syamal Roy<sup>1</sup>

**1** Division of Infectious Diseases and Immunology, Indian Institute of Chemical Biology, Council of Scientific and Industrial Research, Kolkata, India, **2** Division of Cell Biology and Immunology, Institute of Microbial Technology, Council of Scientific and Industrial Research, Chandigarh, India, **3** Institute of Microbial Technology, Council of Scientific and Industrial Research, Chandigarh, India

## Abstract

The inability of sodium antimony gluconate (SAG)-unresponsive kala-azar patients to clear *Leishmania donovani* (LD) infection despite SAG therapy is partly due to an ill-defined immune-dysfunction. Since dendritic cells (DCs) typically initiate anti-leishmanial immunity, a role for DCs in aberrant LD clearance was investigated. Accordingly, regulation of SAG-induced activation of murine DCs following infection with LD isolates exhibiting two distinct phenotypes such as antimony-resistant (Sb<sup>R</sup>LD) and antimony-sensitive (Sb<sup>S</sup>LD) was compared *in vitro*. Unlike Sb<sup>S</sup>LD, infection of DCs with Sb<sup>R</sup>LD induced more IL-10 production and inhibited SAG-induced secretion of proinflammatory cytokines, up-regulation of co-stimulatory molecules and leishmanicidal effects. Sb<sup>R</sup>LD inhibited these effects of SAG by blocking activation of PI3K/AKT and NF-κB pathways. In contrast, Sb<sup>S</sup>LD failed to block activation of SAG (20 μg/ml)-induced PI3K/AKT pathway; which continued to stimulate NF-κB signaling, induce leishmanicidal effects and promote DC activation. Notably, prolonged incubation of DCs with Sb<sup>S</sup>LD also inhibited SAG (20 μg/ml)-induced activation of PI3K/AKT and NF-κB pathways and leishmanicidal effects, which was restored by increasing the dose of SAG to 40 μg/ml. In contrast, Sb<sup>R</sup>LD inhibited these SAG-induced events regardless of duration of DC exposure to Sb<sup>R</sup>LD or dose of SAG. Interestingly, the inhibitory effects of isogenic Sb<sup>S</sup>LD expressing ATP-binding cassette (ABC) transporter MRPA on SAG-induced leishmanicidal effects mimicked that of Sb<sup>R</sup>LD to some extent, although antimony resistance in clinical LD isolates is known to be multifactorial. Furthermore, NF-κB was found to transcriptionally regulate expression of murine γglutamylcysteine synthetase heavy-chain (mγGCS<sub>hc</sub>) gene, presumably an important regulator of antimony resistance. Importantly, Sb<sup>R</sup>LD but not Sb<sup>S</sup>LD blocked SAG-induced mγGCS expression in DCs by preventing NF-κB binding to the mγGCS<sub>hc</sub> promoter. Our findings demonstrate that Sb<sup>R</sup>LD but not Sb<sup>S</sup>LD prevents SAG-induced DC activation by suppressing a PI3K-dependent NF-κB pathway and provide the evidence for differential host-pathogen interaction mediated by Sb<sup>R</sup>LD and Sb<sup>S</sup>LD.

**Citation:** Haldar AK, Yadav V, Singhal E, Bisht KK, Singh A, et al. (2010) *Leishmania donovani* Isolates with Antimony-Resistant but Not -Sensitive Phenotype Inhibit Sodium Antimony Gluconate-Induced Dendritic Cell Activation. PLoS Pathog 6(5): e1000907. doi:10.1371/journal.ppat.1000907

**Editor:** Ingrid Müller, Imperial College London, United Kingdom

**Received:** June 29, 2009; **Accepted:** April 12, 2010; **Published:** May 20, 2010

**Copyright:** © 2010 Haldar et al. This is an open-access article distributed under the terms of the Creative Commons Attribution License, which permits unrestricted use, distribution, and reproduction in any medium, provided the original author and source are credited.

**Funding:** This study was supported by intramural grant from the Council of Scientific and Industrial Research, Government of India (S.R. and P.S.). The funder had no role in study design, data collection and analysis, decision to publish, or preparation of the manuscript.

**Competing Interests:** The authors have declared that no competing interests exist.

\* E-mail: psen@imtech.res.in

† These authors contributed equally to this work.

‡ Current address: New York University School of Medicine, Skirball Institute of Biomolecular Medicine, Langone Medical Centre, Molecular Pathogenesis, New York, New York, United States of America

## Introduction

Kala-azar, caused by *Leishmania donovani* (LD), is regarded as the most severe form of leishmanial infection, which can be fatal in patients when left untreated. In the absence of an effective vaccine, treatment with pentavalent antimonial compounds such as sodium antimony gluconate (SAG) remains as the first-choice therapy for kala-azar. However, therapeutic utility of SAG is now jeopardized by the emergence of antimony-resistant strains of LD [1], which is becoming a major concern of the World Health Organization ([www.who.int/infections-disease-report/2000](http://www.who.int/infections-disease-report/2000)).

Resistance to antimonial drugs, as observed in leishmanial infection, is marked by two independent “checkpoints”. The first is

associated with the impaired biological reduction of the pentavalent antimony (Sb<sup>V</sup>) prodrug to a toxic trivalent (Sb<sup>III</sup>) form, although the site (macrophage (Mφ) and/or parasite) and mechanism of reduction (enzymatic or nonenzymatic) are undefined. The second checkpoint involves a regulatory mechanism promoting reduced influx and/or enhanced efflux/sequestration of active drug that lowers its intracellular accumulation [2,3]. Importantly, these two events are largely dependent on the intracellular level of thiol compounds such as glutathione (γglutamylcysteinylglycine, GSH) and parasite-specific trypanothione, which in turn are regulated by both host- and LD-γglutamylcysteine synthetase, a rate-limiting enzyme in glutathione biosynthesis [2–5]. Although the increased expression of

## Author Summary

Kala-azar, a life-threatening parasitic disease caused by *Leishmania donovani* (LD), is widening its base in different parts of the world. Currently, there is no effective vaccine against kala-azar. The antimonial drugs like sodium antimony gluconate (SAG) have been the mainstay of therapy for this disease. Recently, due to the emergence of antimony-resistance in parasites, SAG often fails to cure kala-azar patients, which is compounding the disaster further. It is still unknown how infection with LD exhibiting antimony-resistant phenotype, in contrast to antimony-sensitive phenotype, is handled by the kala-azar patients upon SAG treatment. This demands an understanding of the nature of host immune responses against these two distinct categories of parasites. Accordingly, we compared the impact of infection with LD exhibiting antimony-resistant versus antimony-sensitive phenotype on dendritic cells (DCs). DCs upon activation/maturation initiate anti-leishmanial immunity. We showed that parasites with antimony-resistant but not antimony-sensitive phenotype prevented SAG-induced DC activation/maturation by blocking activation of NF- $\kappa$ B. The latter is a key signaling pathway regulating DC activation/maturation. Our studies for the first time provide both a cellular and molecular basis for differential response of host cells to parasite isolates with antimony-resistant and antimony-sensitive phenotype, which may influence the outcome of the disease.

$\gamma$ glutamylcysteine synthetase ( $\gamma$ GCS) gene in antimony-resistant strains of LD is controversial [3–6], inhibition of  $\gamma$ GCS by buthionine sulfoxamine (BSO) reverses Sb<sup>III</sup> resistance in LD [7]. Therefore,  $\gamma$ GCS expression contributes to antimony resistance in LD by regulating intracellular thiol level.

In addition to the mechanisms noted above, the unresponsiveness of kala-azar patients to treatment with SAG is also believed to be a consequence of skewed type-2 immune response that suppresses interferon (IFN)  $\gamma$ -mediated protective immunity [8]. Nonetheless, IFN $\gamma$  production by T cells is reduced in non-responders compared to SAG-responders [8,9]. The endogenous production of IFN $\gamma$  and importantly, its principal inducer IL-12, determine the anti-leishmanial efficacy of SAG in a fully immunocompetent host infected with LD [10,11]. Following LD infection, the early production of IL-12 is exclusively mediated by dendritic cells (DCs) [12]. This tempted us to speculate a possible involvement of DCs in regulating “SAG responsiveness” versus “unresponsiveness” in kala-azar patients.

DCs normally play a key role in initiating and regulating *Leishmania*-specific T cell reactivity [13,14]. However, the T cell stimulatory capacity of DCs depends on their state of activation and maturation. In contrast to mature DCs, immature DCs exhibit a reduced capacity to stimulate T cells due to low expression of MHC and co-stimulatory molecules, and the lack of production of proinflammatory cytokines. Gene expression associated with the development, activation, maturation and antigen-presenting cell (APC) function of DCs is largely regulated by the transcription factor NF- $\kappa$ B [15–18]. For instance, inhibition of NF- $\kappa$ B activation suppresses DC maturation and APC function [19,20]. NF- $\kappa$ B is a hetero- or homo-dimeric complex of structurally related proteins p50, p52, p65 (RelA), cRel and RelB. In resting cells, NF- $\kappa$ B is sequestered in the cytoplasm by the inhibitory proteins I $\kappa$ B $\alpha$ , I $\kappa$ B $\beta$  and I $\kappa$ B $\epsilon$  [21]. However, cellular activation with wide range of stimuli such as LPS, TNF $\alpha$  and IL-1 phosphorylates and thereby activates a multisubunit complex I $\kappa$ B

kinase (IKK) consisting of IKK $\alpha$ /IKK1, IKK $\beta$ /IKK2 and IKK $\gamma$ /NEMO [22]. Subsequently, activated IKK promotes downstream events, for example, phosphorylation followed by polyubiquitination and 26S proteasome-mediated degradation of I $\kappa$ B proteins [21]. NF- $\kappa$ B dimers then translocate to the nucleus, and bind to consensus sequences to induce gene transcription. Notably, the phosphatidylinositol 3-kinase (PI3K)/AKT pathway has been demonstrated in a variety of models to regulate NF- $\kappa$ B activation [20,23,24].

Studies demonstrated that stimulation with SAG induces the PI3K/AKT pathway and enhances production of proinflammatory cytokines and leishmanicidal effector molecules in M $\phi$  [25]. Furthermore, SAG stimulates NF- $\kappa$ B activation in different cell types, such as CD4<sup>+</sup> T cells and peripheral blood mononuclear cells [26]. Importantly, blockade of NF- $\kappa$ B activation is shown to impair  $\gamma$ GCS expression in murine M $\phi$ -like cell line [27]. However, direct role of NF- $\kappa$ B in transcriptional regulation of murine  $\gamma$ GCS promoter is undefined. With this in mind, the current study was initiated to define the role of SAG in murine DC activation and its regulation by LD isolates with SAG-resistant (Sb<sup>R</sup>LD) and SAG-sensitive (Sb<sup>S</sup>LD) phenotype. We demonstrate that Sb<sup>R</sup>LD but not Sb<sup>S</sup>LD infection suppresses SAG-induced activation/maturation and  $\gamma$ GCS expression of DCs by inhibiting NF- $\kappa$ B activation in a PI3K/AKT-dependent manner.

## Results

### Sb<sup>S</sup>LD- and Sb<sup>R</sup>LD-infected DCs respond differentially to SAG treatment

Although M $\phi$ s are regarded as a “primary target” for leishmanial infection, recent studies indicate DC infection with various *Leishmania* spp. including LD [28,29]. Indeed, LD infection was observed in both immature bone marrow-derived DC (BMDC) (CD11c<sup>+</sup>CD8 $\alpha$ <sup>+</sup>) and splenic DC (sDC) (Figure 1A). To determine the leishmanicidal effect of SAG on intracellular Sb<sup>R</sup>LD and Sb<sup>S</sup>LD in DCs, BMDCs and sDCs were infected with GFP expressing promastigotes of Sb<sup>S</sup>LD strain 2001 (GFP-2001) or Sb<sup>R</sup>LD strain R5 (GFP-R5) for 3 hours, stimulated with SAG (20  $\mu$ g/ml) for 24 hours, and the frequency of infected DCs measured via flow cytometry. A comparable level of DC infection was observed with both GFP-2001 and GFP-R5 (Figure 1B). However, the percentage of BMDCs or sDCs infected with GFP-2001 (Sb<sup>S</sup>LD) was reduced by 5 to 9-fold following SAG treatment (Figure 1B). In marked contrast, SAG treatment failed to exhibit any significant effect on GFP-R5 (Sb<sup>R</sup>LD) infection in DCs (Figure 1B). Furthermore, analyses via Giemsa staining demonstrated that intracellular amastigotes of other Sb<sup>R</sup>LD strains exhibit similar resistance to the SAG-induced leishmanicidal effect in DCs. For instance, a significant reduction in both percentage of infected BMDCs and intracellular parasite number were observed in AG83 (Sb<sup>S</sup>LD)- and to a lesser extent in 39 (Sb<sup>R</sup>LD)-infected BMDCs after SAG treatment (10 and 20  $\mu$ g/ml) for 24 and 48 hours (Figure S1). Titration of parasites demonstrated that parasite to DC ratio (multiplicity of infection; MOI) of 10:1 was the optimum ratio for maximum LD infection in DCs (data not shown). Therefore, this MOI was used for all subsequent experiments unless otherwise stated.

Next, the regulation of SAG-induced activation and maturation of DCs by Sb<sup>R</sup>LD and Sb<sup>S</sup>LD was investigated. For this purpose, BMDCs and sDCs were infected with Sb<sup>R</sup>LD and Sb<sup>S</sup>LD promastigotes for 3 hours, washed and cultured with or without SAG (20  $\mu$ g/ml) for an additional 48 hours. The activation and maturation of DCs were determined by analyzing MHC and co-stimulatory molecule expression and secretion of cytokines.

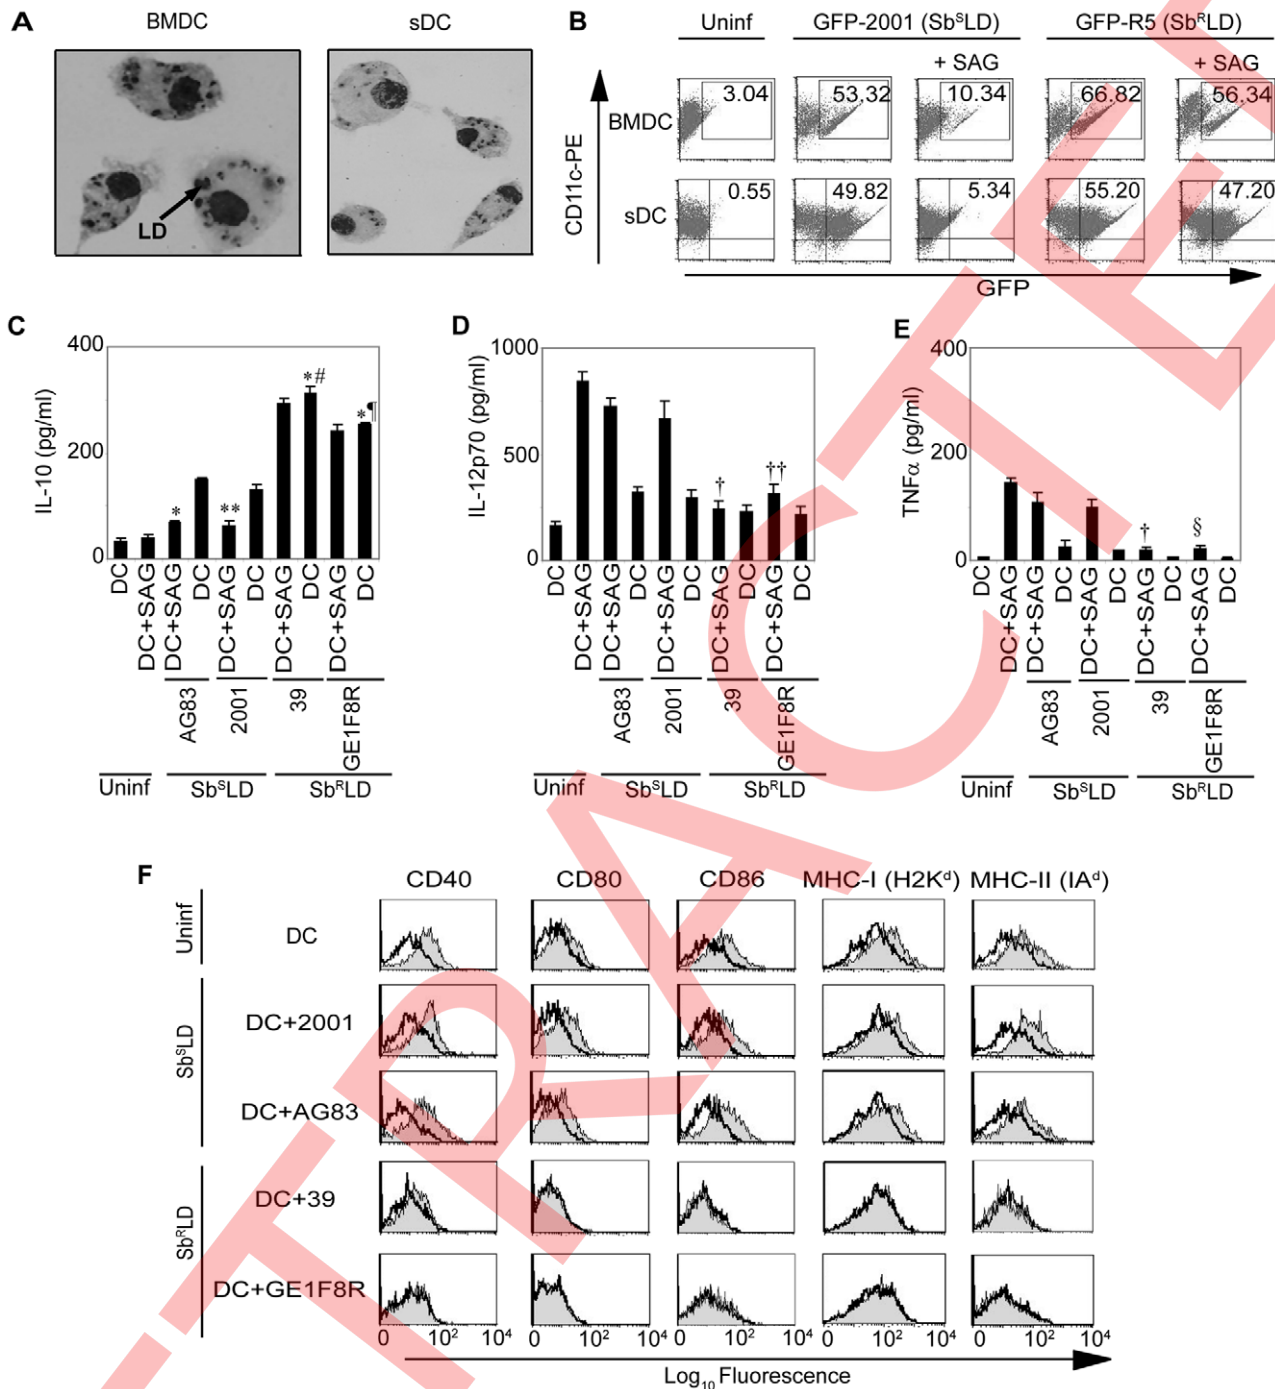

**Figure 1. SAG treatment exhibits differential effect on Sb<sup>R</sup>LD- and Sb<sup>S</sup>LD-infected DCs.** (A) BMDCs and *ex vivo* derived sDCs were infected with 2001 promastigotes (Sb<sup>S</sup>LD) *in vitro* at a MOI of 10:1 for overnight, washed thoroughly to remove free parasites and localization of intracellular LD parasites was ascertained via Giemsa staining. (B) BMDCs and sDCs were infected *in vitro* with GFP-2001 (Sb<sup>S</sup>LD) or GFP-R5 (Sb<sup>R</sup>LD) promastigotes, as described above, for 3 hours or left uninfected. Free parasites were removed from DCs by thorough washing. The LD-infected DCs were then cultured with or without SAG treatment (20  $\mu$ g/ml) for another 24 hours whereas uninfected DCs were left untreated. DCs were immunostained with  $\alpha$ CD11c-PE and LD infection in DC was analyzed by FACS. Numbers in upper right quadrant indicate the percentage of LD-infected DCs as represented by CD11c<sup>+</sup>GFP<sup>+</sup> cells. In some experiments (C-F), BMDCs were infected with Sb<sup>S</sup>LD (AG83, 2001) or Sb<sup>R</sup>LD (39, GE1F8R) strains for 3 hours or left uninfected as described above. DCs were then washed to remove free parasites and stimulated with SAG (20  $\mu$ g/ml) for 48 hours and (C) IL-10, (D) IL-12p70 and (E) TNF $\alpha$  secretion in culture supernatants were measured via ELISA or (F) surface expression of co-stimulatory molecules and MHCs measured via FACS. Open histograms represent untreated DCs and shaded histograms represent DCs plus SAG. For this and all other figures the label "Uninf" represents uninfected DCs. Data are the representative of three independent experiments. \* $p < 0.001$  versus DC+AG83; † $p = 0.001$ , # $p = 0.002$  and \*\* $p = 0.003$  versus DC+2001; †† $p = 0.004$  and ‡ $p = 0.002$  versus DC+SAG (Student's *t* test). Error bars indicate mean  $\pm$  SD. doi:10.1371/journal.ppat.1000907.g001

Infection of BMDCs and sDCs with Sb<sup>R</sup>LD strains 39 or GE1F8R induced more IL-10 production as compared with Sb<sup>S</sup>LD strains AG83 or 2001 (Figures 1C and S2A). Interestingly, IL-10 secretion from Sb<sup>R</sup>LD-infected DCs was not affected by SAG treatment (Figures 1C and S2A). In contrast, SAG treatment significantly inhibited IL-10 secretion by Sb<sup>S</sup>LD-infected DCs (Figures 1C and S2A). Furthermore, SAG-stimulated secretion of proinflammatory cytokines such as IL-12p70 and TNF $\alpha$  from DCs were inhibited by Sb<sup>R</sup>LD and not Sb<sup>S</sup>LD infection (Figures 1D-E and S2B-C). Finally, SAG treatment up-regulated CD40, CD80, CD86, MHC-I (H2K<sup>d</sup>) and MHC-II (IA<sup>d</sup>) expression in BMDCs infected with Sb<sup>S</sup>LD but not Sb<sup>R</sup>LD (Figure 1F). Consistent with work by other groups [30,31], co-stimulatory molecule and MHC expression of untreated BMDCs remained unaltered following Sb<sup>R</sup>LD or Sb<sup>S</sup>LD infection (Figure 1F). Together, these results demonstrate that SAG treatment protects DCs from Sb<sup>S</sup>LD but not Sb<sup>R</sup>LD infection. Moreover, stimulation with SAG fails to activate and mature Sb<sup>R</sup>LD-infected DCs, while Sb<sup>S</sup>LD-infected DCs are still capable of activation and maturation upon SAG treatment.

### SAG treatment induces NF- $\kappa$ B activation in DCs

Since NF- $\kappa$ B is a key regulator of maturation and APC function of DCs, the effect of SAG treatment on NF- $\kappa$ B activation was investigated. BMDCs were treated with SAG for varying times and DNA binding activity of nuclear NF- $\kappa$ B was determined via

electrophoretic mobility shift assay (EMSA). Relative to untreated BMDCs, a 23-fold increase in NF- $\kappa$ B DNA binding activity was initially observed by 0.3 hours, which persisted up to 1 hour after SAG treatment (Figure 2A). Notably, OCT-1 DNA binding was unaltered despite SAG treatment indicating that SAG-induced enhancement of nuclear DNA binding was NF- $\kappa$ B-specific (Figure 2A). Furthermore, supershift analysis using antibodies specific for each Rel family member demonstrated that SAG stimulation of BMDCs induced DNA binding of NF- $\kappa$ B complexes consisting of the p50, p65 and RelB subunits (Figure 2B). In contrast to SAG, BMDC treatment with varying concentrations (25 to 200  $\mu$ g/ml) of sodium gluconate for 0.3 hours, or 200  $\mu$ g/ml of sodium gluconate for various times failed to induce DNA binding activity of NF- $\kappa$ B (Figure 2C-D).

Consistent with the EMSA data, SAG treatment for 0.3, 0.5 and 1 hour induced degradation of I $\kappa$ B proteins in BMDCs (Figure 3A). Importantly, SAG-induced I $\kappa$ B degradation corresponded to enhanced I $\kappa$ B $\alpha$  phosphorylation (Figure 3B), which could be due to increased activity of upstream IKK complex. To test this hypothesis, BMDCs were stimulated with SAG for 0.3, 0.5 and 1 hour. IKK signalosome was immunoprecipitated from cytoplasmic extracts and kinase activity of the complex determined by measuring phosphorylation of an I $\kappa$ B $\alpha$ -GST substrate *in vitro*. BMDCs stimulated with SAG for 0.3, 0.5 and 1 hour exhibited approximately 3.6 to 4.7-fold increase in IKK activity compared

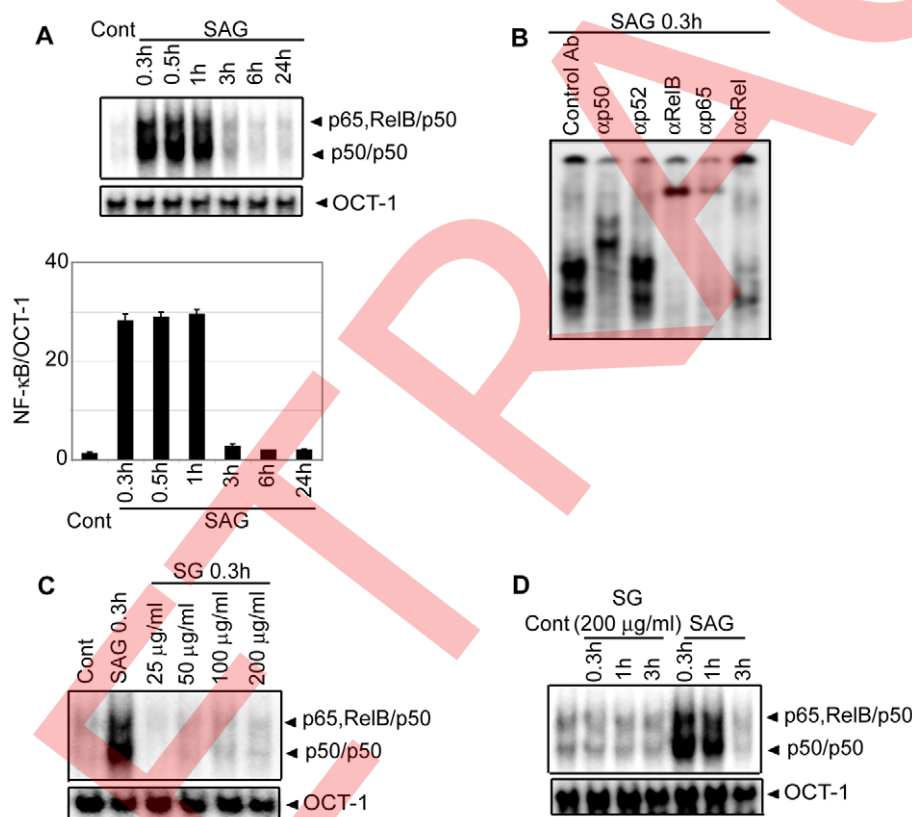

**Figure 2. Stimulation with SAG increases nuclear NF- $\kappa$ B DNA binding activity in BMDCs.** BMDCs were treated with SAG (20  $\mu$ g/ml) or specified concentrations of sodium gluconate (SG) for indicated times or left untreated. (A, C-D) DNA binding activity of nuclear NF- $\kappa$ B to H2K-specific oligonucleotide probe was measured via EMSA. The OCT-1 DNA binding was used as an internal control. Densitometric analysis represents the ratio of intensity of NF- $\kappa$ B to OCT-1 binding per unit area and is represented as arbitrary units. (B) Binding of different NF- $\kappa$ B complexes to H2K-DNA probe was determined by supershift EMSA using rabbit IgG (Control Ab) or Abs specific for different NF- $\kappa$ B subunits. For this and all other figures, control (Cont) lane represents uninfected DCs without SAG stimulation. Data are representative of three independent experiments. Error bars indicate mean  $\pm$  SD.

doi:10.1371/journal.ppat.1000907.g002



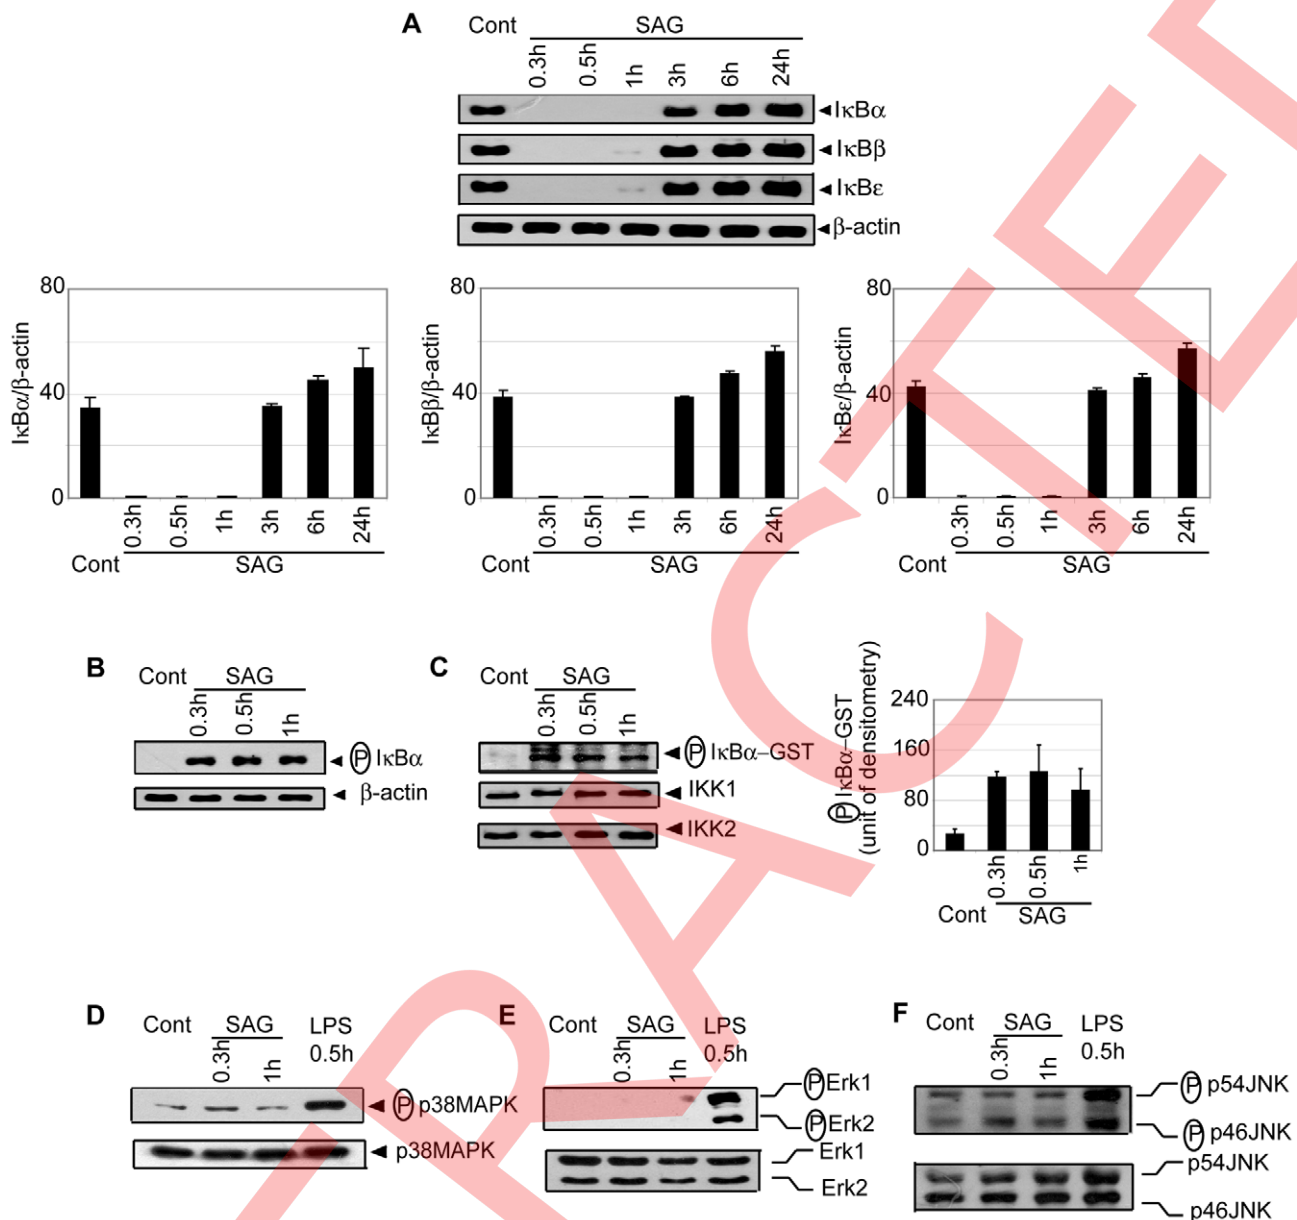

**Figure 3. SAG-treated BMDCs exhibit increased phosphorylation and degradation of IκB proteins and IKK activity.** BMDCs were untreated or stimulated either with 20 μg/ml SAG (A-F) or 500 ng/ml LPS (D-F) for specified times. (A) Expression of IκBα, IκBβ, IκBε and β-actin protein in cytoplasmic extracts was detected by Western blot using the same blot. Densitometric analyses represent the ratio of intensity of the corresponding IκB protein to β-actin expression per unit area and are represented as an arbitrary unit. (B) Cytoplasmic phospho-IκBα versus β-actin protein expression was detected via Western blot with the same blot. (C) *In vitro* IKK activity was determined by measuring phosphorylation of an IκBα-GST substrate. IKK1 and IKK2 protein expression in immunoprecipitated samples was analyzed via Western blot. Densitometric analysis indicates the intensity of phosphorylated (P) IκBα-GST substrate in an arbitrary unit. The levels of (D) phospho-p38MAPK versus p38MAPK, (E) phospho-ERK versus ERK and (F) phospho-JNK versus JNK protein expression in whole cell lysates were determined via Western blot. Data are representative of three independent experiments. Error bars indicate mean ± SD. doi:10.1371/journal.ppat.1000907.g003

to untreated BMDCs (Figure 3C). In comparison, the level of IKK1 and IKK2 proteins were similar in all BMDC extracts (Figure 3C). The SAG-induced NF-κB DNA binding, IκBα degradation and IKK activity were also observed in sDCs (Figure S3).

Of note, SAG treatment failed to activate the mitogen-activated protein kinase (MAPK) pathway in BMDCs. In contrast to LPS stimulation, phosphorylation of p38MAPK, ERK1/ERK2 and JNK was not detected in SAG-treated DCs

(Figure 3D-F). Collectively, these findings demonstrate that stimulation with SAG induces activation of the IKK complex, phosphorylation and degradation of IκB proteins and downstream nuclear DNA binding of NF-κB in both BMDCs and sDCs, and that the induction of these events in DC is contributed by antimonial moiety of SAG. Furthermore, among different signaling pathways, which are known to regulate DC activation/maturation, NF-κB signaling is selectively induced by SAG treatment.

## Sb<sup>R</sup>LD but not Sb<sup>S</sup>LD infection inhibits SAG-induced NF- $\kappa$ B activation in DCs

The effect(s) of Sb<sup>R</sup>LD and Sb<sup>S</sup>LD infection on SAG-stimulated NF- $\kappa$ B activation in DCs was determined. BMDCs were infected with either promastigotes or amastigotes of 39 (Sb<sup>R</sup>LD) or 2001 (Sb<sup>S</sup>LD) for varying times, stimulated with SAG for 0.3 hours and nuclear NF- $\kappa$ B DNA binding activity to H2K-specific probe measured via EMSA. SAG-induced NF- $\kappa$ B activity was completely inhibited in BMDCs upon infection with either 39 promastigotes (39Pm) or amastigotes (39Am) (Sb<sup>R</sup>LD) at all times of LD infection analyzed (Figure 4A-B). In contrast, BMDC infection with 2001 promastigotes (2001Pm) or amastigotes (2001Am) (Sb<sup>S</sup>LD) for up to 6 and 3 hours, respectively, failed to inhibit SAG-stimulated NF- $\kappa$ B DNA binding (Figure 4A-B). SAG-induced NF- $\kappa$ B DNA binding activity was also inhibited in 39Pm (Sb<sup>R</sup>LD)-infected sDCs (Figure S4A). The ability of Sb<sup>R</sup>LD to block SAG-stimulated NF- $\kappa$ B DNA binding in DCs was not LD strain specific. For example, BMDC infection with promastigotes of Sb<sup>R</sup>LD strain GE1F8R (GE1F8RPm), unlike Sb<sup>S</sup>LD strain AG83 (AG83Pm), completely prevented SAG-induced NF- $\kappa$ B DNA binding (Figure S4B).

Our finding that SAG-induced NF- $\kappa$ B activity is inhibited selectively in Sb<sup>R</sup>LD-infected BMDCs was further confirmed by temporal analysis of I $\kappa$ B protein degradation and activation of IKK. BMDC infection with either 2001Pm or 2001Am (Sb<sup>S</sup>LD) for up to 6 or 3 hours, respectively, had no significant effect on SAG-induced I $\kappa$ B degradation (Figure 4C-D). In contrast, I $\kappa$ B degradation stimulated by SAG was persistently inhibited by 39 (Sb<sup>R</sup>LD) regardless of the duration of BMDC infection and form of parasite (Figure 4C-D). SAG-induced I $\kappa$ B $\alpha$  degradation was similarly inhibited in sDCs infected with 39Pm (Sb<sup>R</sup>LD) and BMDCs infected with promastigotes of a different Sb<sup>R</sup>LD strain (Figure S4C-D). Interestingly, inhibition of SAG-induced I $\kappa$ B degradation corresponded with a reduction in I $\kappa$ B $\alpha$  phosphorylation in BMDCs infected with Sb<sup>R</sup>LD promastigotes (Figure 4C, E). Furthermore, SAG-induced IKK activation as determined by *in vitro* IKK activity or phosphorylation of IKK1 and IKK2 was inhibited in extracts prepared from BMDCs and sDCs infected with Sb<sup>R</sup>LD but not Sb<sup>S</sup>LD promastigotes (Figures 4F and S4E-F). BMDC infection with Sb<sup>R</sup>LD and not Sb<sup>S</sup>LD amastigotes also blocked SAG-stimulated IKK activity (Figure 4G). Additionally, pretreatment of BMDCs with parasite antigen(s) (Sb<sup>R</sup>LDsAg) or culture supernatant (Sb<sup>R</sup>LDs) of Sb<sup>R</sup>LD inhibited SAG-induced NF- $\kappa$ B DNA binding activity, I $\kappa$ B degradation and IKK activity; whereas culture supernatant of Sb<sup>S</sup>LD (Sb<sup>S</sup>LDs) or Sb<sup>S</sup>LD-derived antigen(s) (Sb<sup>S</sup>LDsAg) did not (Figure 5).

As demonstrated in Figure 4A-D, SAG-induced NF- $\kappa$ B activation was inhibited in BMDCs infected at a MOI 10:1 (promastigote or amastigote to DC) with Sb<sup>S</sup>LD promastigotes or amastigotes for 24 or 6 hours, respectively, similar to Sb<sup>R</sup>LD-infected BMDCs. Accordingly, we tested whether the increased intracellular parasite number at these time points of infection rendered 20  $\mu$ g/ml of SAG insufficient to activate NF- $\kappa$ B. In fact, number of intracellular 2001 (Sb<sup>S</sup>LD) or 39 (Sb<sup>R</sup>LD) was significantly increased if BMDCs were infected with promastigotes for 24 hours rather than 6 hours (Figure S5A). Likewise, BMDCs infected with amastigotes of the above LD strains for 6 hours exhibited increased intracellular parasite number compared to BMDCs infected for 3 hours (Figure S5B). Notably, SAG (20  $\mu$ g/ml)-induced NF- $\kappa$ B DNA binding and I $\kappa$ B $\alpha$  degradation were detected despite the presence of intracellular parasites in BMDCs infected with 2001Pm and 2001Am (Sb<sup>S</sup>LD) for 6 and 3 hours, respectively (Figures 4A-D and S5A-B). Therefore, these two time points of BMDC infection were selected as a “reference” to

analyze the basis of defective SAG-induced NF- $\kappa$ B activation in BMDCs infected with 2001Pm or 2001Am (Sb<sup>S</sup>LD) for 24 or 6 hours, respectively. Initially, the association of increased intracellular parasite number with impairment of SAG-induced NF- $\kappa$ B activation was verified in both BMDCs infected with 2001Pm or 2001Am (Sb<sup>S</sup>LD) for 24 or 6 hours, respectively. For this purpose, BMDCs were infected with 2001Pm (Sb<sup>S</sup>LD) or 39Pm (Sb<sup>R</sup>LD) for 24 hours at varying MOIs and stimulated with SAG (20  $\mu$ g/ml) for 0.3 hours. Despite LD infection for fixed duration (24 hours), this approach established varying levels of intracellular parasite number, which was elevated in BMDCs infected at MOI 10:1 compared to other MOIs (Figure S6A). BMDC infection with both 2001Pm (Sb<sup>S</sup>LD) and 39Pm (Sb<sup>R</sup>LD) at a MOI 10:1 inhibited SAG-induced NF- $\kappa$ B DNA binding activity and I $\kappa$ B $\alpha$  degradation (Figure 6A-B). However, SAG-induced NF- $\kappa$ B DNA binding activity and I $\kappa$ B $\alpha$  degradation were observed only in 2001Pm (Sb<sup>S</sup>LD)-infected BMDCs but not 39Pm (Sb<sup>R</sup>LD)-infected BMDCs when BMDC infection was done at MOIs 2.5:1 and 5:1 (Figure 6A-B). Notably, at each of these MOIs both 2001Pm (Sb<sup>S</sup>LD)-infected BMDCs and 39Pm (Sb<sup>R</sup>LD)-infected BMDCs had comparable level of intracellular parasite number (Figure S6A). Using identical MOIs for BMDC infection, similar results were obtained when the intracellular parasite number and SAG-induced NF- $\kappa$ B activation were analyzed in BMDCs infected for 6 hours with 39Am (Sb<sup>R</sup>LD) and 2001Am (Sb<sup>S</sup>LD) (Figures 6C-D and S6B). These findings suggest that irrespective of the form of parasite, 2001 (Sb<sup>S</sup>LD) and 39 (Sb<sup>R</sup>LD) differentially regulate SAG-induced NF- $\kappa$ B signaling in DCs with low intracellular parasite number.

It is possible that with increased intracellular parasite number 2001(Sb<sup>S</sup>LD), similar to 39 (Sb<sup>R</sup>LD), developed the capacity to inhibit SAG-induced NF- $\kappa$ B activation and that occurred when BMDCs were infected at a MOI 10:1 with 2001Pm or 2001Am (Sb<sup>S</sup>LD) for 24 and 6 hours, respectively. However, this possibility was ruled out when NF- $\kappa$ B activation in response to 20 and 40  $\mu$ g/ml of SAG treatment was analyzed in BMDCs infected for 6 and 24 hours with 2001Pm (Sb<sup>S</sup>LD) or 39Pm (Sb<sup>R</sup>LD) at a MOI of 10:1. The effect of SAG (40  $\mu$ g/ml) stimulation was also verified in BMDCs infected similarly with 2001Am or 39Am for 3 and 6 hours. Stimulation with both 20 and 40  $\mu$ g/ml of SAG induced NF- $\kappa$ B DNA binding and I $\kappa$ B $\alpha$  degradation in BMDCs infected with 2001Pm (Sb<sup>S</sup>LD) for 6 hours (Figure 6E-F). In contrast, BMDCs infected for 24 hours with 2001Pm (Sb<sup>S</sup>LD) exhibited enhanced NF- $\kappa$ B DNA binding and I $\kappa$ B $\alpha$  degradation only when stimulated with 40  $\mu$ g/ml of SAG (Figure 6E-F). Similarly, the inhibition of SAG-induced NF- $\kappa$ B DNA binding and I $\kappa$ B $\alpha$  degradation due to BMDC infection with 2001Am (Sb<sup>S</sup>LD) for 6 hours was overcome by increasing the dose of SAG from 20 to 40  $\mu$ g/ml (Figure 6G-H). On the contrary, 39Pm/39Am (Sb<sup>R</sup>LD) continued to suppress NF- $\kappa$ B DNA binding and I $\kappa$ B $\alpha$  degradation at various durations of infection tested irrespective of dose of SAG used for stimulation (Figure 6E-H). Together, these results demonstrate that SAG-induced NF- $\kappa$ B signaling is impaired by Sb<sup>R</sup>LD infection of DCs.

## Sb<sup>R</sup>LD inhibits SAG-induced NF- $\kappa$ B signaling, DC activation and leishmanicidal effects by suppressing the PI3K/AKT pathway in an IL-10-independent manner

Stimulation with SAG induces PI3K/AKT activation in M $\phi$  [25]. Furthermore, PI3K/AKT regulates the NF- $\kappa$ B pathway in DCs via IKK [19,20]. Therefore, the possibility that SAG-induced activation of NF- $\kappa$ B in DCs is PI3K/AKT-dependent was investigated. Initially, the effect of SAG stimulation on AKT activation was assessed by measuring phosphorylation of AKT.

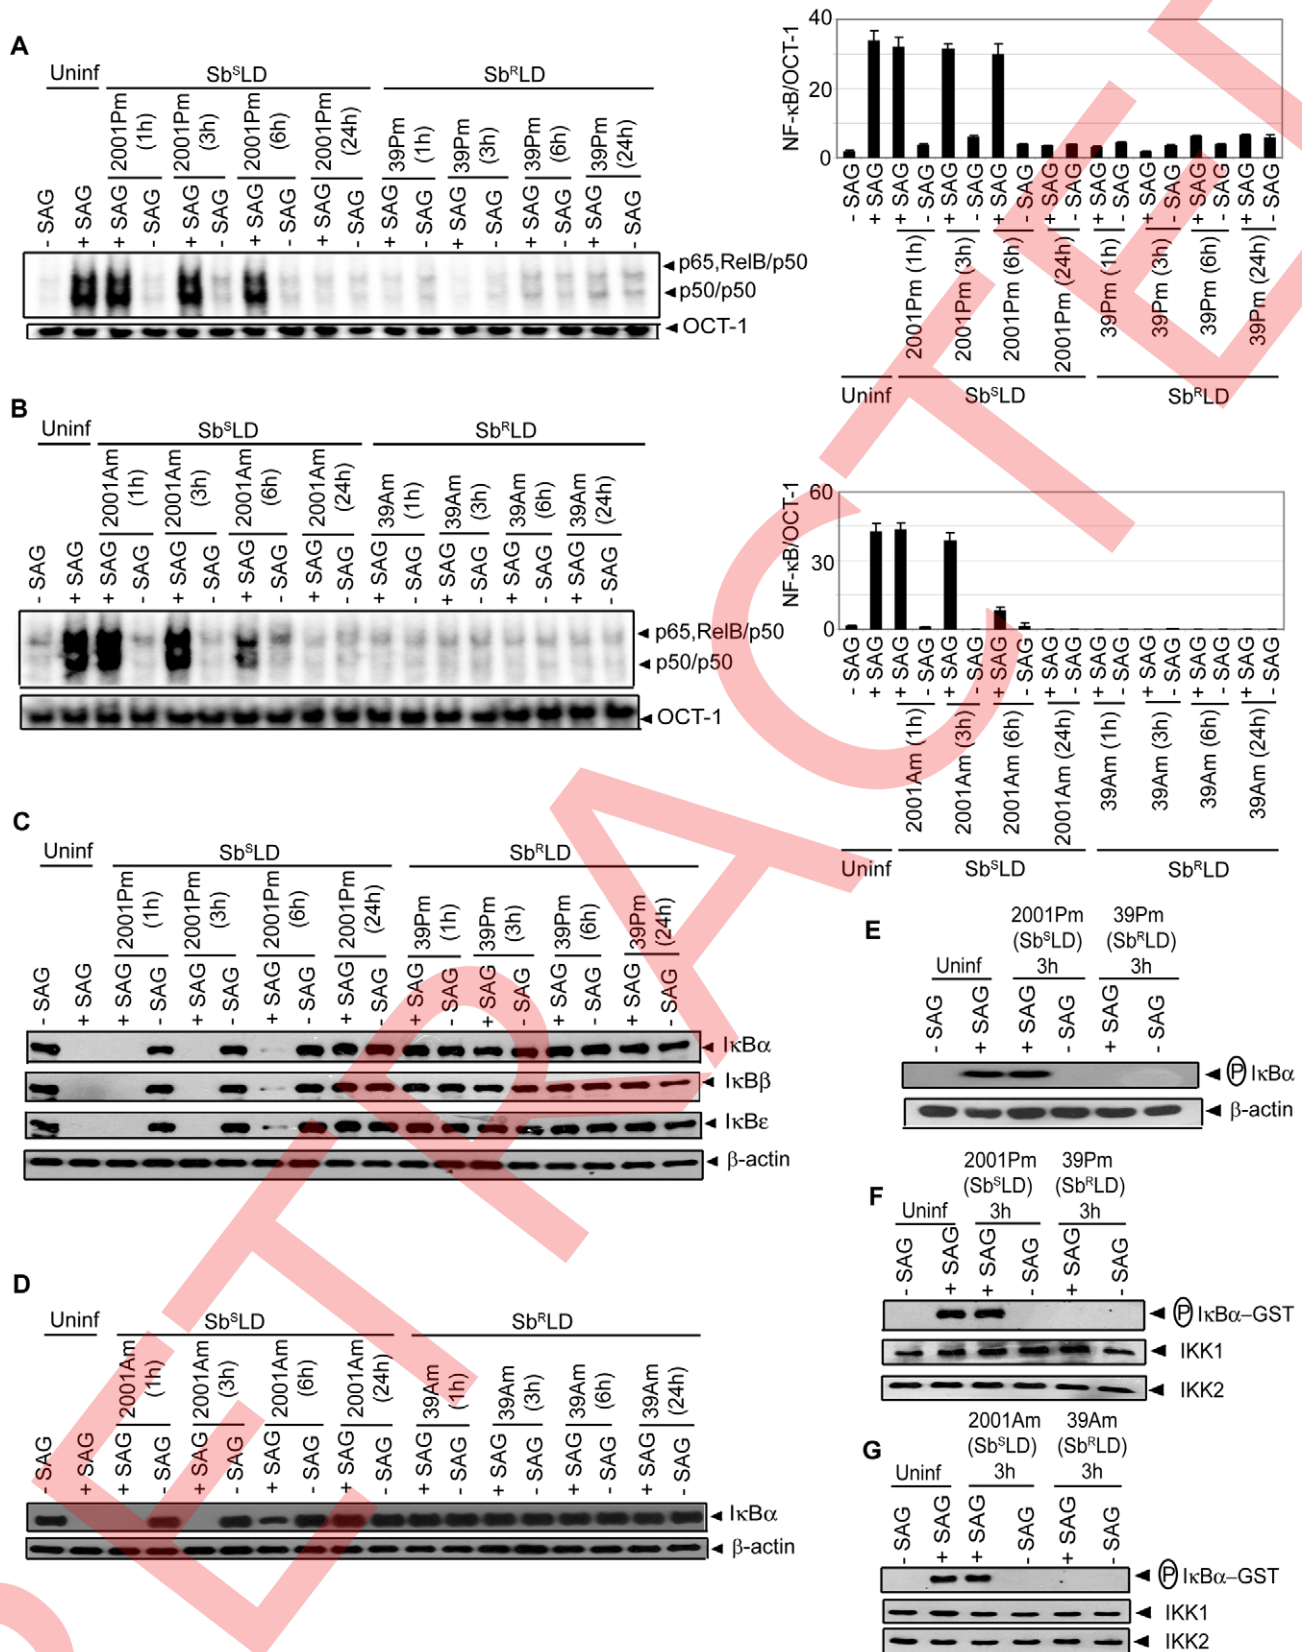



per unit area and represented as arbitrary units. (C-D) Cytoplasmic I $\kappa$ B $\alpha$ , I $\kappa$ B $\beta$ , I $\kappa$ B $\epsilon$  and  $\beta$ -actin protein were detected via Western blot with same blot. (E) Phospho-I $\kappa$ B $\alpha$  was detected by Western blot. The same blot was reprobed for  $\beta$ -actin. (F-G) *In vitro* IKK activity and expression of IKK1 and IKK2 were determined as in Figure 3. Data are representative of three independent experiments. Error bars indicate mean  $\pm$  SD. doi:10.1371/journal.ppat.1000907.g004

Compared to unstimulated BMDCs, SAG treatment induced a 5 to 7-fold increase in AKT phosphorylation in BMDCs (Figure 7A). Notably, SAG-induced AKT phosphorylation was not observed in BMDCs pretreated with PI3K inhibitors wortmannin (Wort) or Ly294002 (Ly) (Figure 7A). Next, the effect of PI3K inhibitors on SAG-induced NF- $\kappa$ B signaling was determined. Pretreatment with Wort or Ly effectively blocked SAG-induced IKK activity, I $\kappa$ B $\alpha$  degradation and nuclear NF- $\kappa$ B DNA binding in BMDCs (Figure 7B-D). Importantly, infection of BMDCs and sDCs with 39Pm (Sb<sup>R</sup>LD) but not 2001Pm (Sb<sup>S</sup>LD) for 3 hours inhibited SAG (20  $\mu$ g/ml)-induced AKT phosphorylation (Figures 7E and S7). SAG (20  $\mu$ g/ml)-induced AKT phosphorylation was also inhibited due to BMDCs infection for 1 and 3 hours with 39Am (Sb<sup>R</sup>LD) but not 2001Am (Sb<sup>S</sup>LD) (Figure 7F). Similar to 39Pm (Sb<sup>R</sup>LD)-infected BMDCs, SAG (20  $\mu$ g/ml)-induced AKT phosphorylation, however, was not observed if BMDCs were infected with 2001Pm (Sb<sup>S</sup>LD) for 24 hours (Figure 7G). Interestingly, AKT phosphorylation was observed in these 2001Pm (Sb<sup>S</sup>LD)-infected BMDCs but not 39Pm (Sb<sup>R</sup>LD)-infected BMDCs upon stimulation with 40  $\mu$ g/ml of SAG (Figure 7G).

Since Sb<sup>R</sup>LD infection stimulated high IL-10 secretion by DCs (Figures 1C and S2A), the possibility that Sb<sup>R</sup>LD inhibited SAG-induced PI3K/AKT (Figures 7E-F and S7) and NF- $\kappa$ B pathways (Figures 4 and S4) in an IL-10-dependent manner was investigated by using a neutralizing  $\alpha$ IL-10 Ab. Temporal analyses demonstrated that significant IL-10 production by BMDCs was initially detected after an infection for 12 hours with Sb<sup>R</sup>LD but not Sb<sup>S</sup>LD promastigotes (Figure 7H). Compared to Sb<sup>S</sup>LD-infected BMDCs, IL-10 production was significantly increased in BMDCs infected with Sb<sup>R</sup>LD for 24 and 48 hours (Figure 7H). Strikingly, SAG-induced AKT phosphorylation and NF- $\kappa$ B DNA binding activity were not restored in BMDCs infected with Sb<sup>R</sup>LD for 3 and 24 hours despite  $\alpha$ IL-10 Ab treatment (Figure 7I-J). However,  $\alpha$ IL-10 Ab treatment effectively prevented inhibition of LPS-induced NF- $\kappa$ B DNA binding in BMDCs pretreated with IL-10 (Figure S8). Therefore, this finding ruled out the involvement of IL-10 in suppression of SAG-induced PI3K/AKT and NF- $\kappa$ B pathways in Sb<sup>R</sup>LD-infected BMDCs.

Consistent with previous report [5], an overexpression of ATP-binding cassette (ABC) transporter MRPA (PGPA) was observed in Sb<sup>R</sup>LD strains 39Pm and GE1F8RPm (Figure S9A). Whether MRPA plays any role in mediating the inhibitory effects of Sb<sup>R</sup>LD on SAG-induced PI3K/AKT and NF- $\kappa$ B activation in DC was then investigated. Accordingly, SAG-induced AKT phosphorylation and NF- $\kappa$ B activation in BMDCs infected for 3 hours with 39Pm (Sb<sup>R</sup>LD), 2001Pm (Sb<sup>S</sup>LD) and isogenic 2001Pm expressing MRPA (2001Pm-MRPA) (Figure S9B) were compared. The latter was developed by transfecting 2001Pm (Sb<sup>S</sup>LD) with a DNA construct expressing MRPA. A complete blockade of SAG-induced AKT phosphorylation and NF- $\kappa$ B DNA binding activity was observed in 39Pm (Sb<sup>R</sup>LD)-infected BMDCs (Figure 8A-B). In contrast, SAG-induced AKT phosphorylation and NF- $\kappa$ B DNA binding activity were detected in 2001Pm (Sb<sup>S</sup>LD)-infected BMDCs (Figure 8A-B). However, infection of BMDCs with 2001Pm-MRPA inhibited SAG-induced AKT phosphorylation and DNA binding activity of NF- $\kappa$ B in BMDCs, albeit partially (Figure 8A-B).

Next, a direct role for PI3K in Sb<sup>R</sup>LD and Sb<sup>S</sup>LD regulation of SAG-induced proinflammatory cytokine secretion and leishmanicidal effects in DCs was investigated using Wort or Ly. In contrast

to 39Pm (Sb<sup>R</sup>LD)-infected BMDCs, SAG-stimulated IL-12 and TNF $\alpha$  production were observed in both uninfected and 2001Pm (Sb<sup>S</sup>LD)-infected BMDCs (Figure 9A-B). However, pretreatment of uninfected and 2001Pm (Sb<sup>S</sup>LD)-infected BMDCs with Wort or Ly significantly inhibited SAG-induced secretion of IL-12 and TNF $\alpha$  (Figure 9A-B). Furthermore, PI3K inhibitors prevented SAG (20  $\mu$ g/ml)-induced reduction of percentage of infected BMDCs and intracellular parasite number in BMDCs infected for 3 hours with 2001Pm (Sb<sup>S</sup>LD) (Figure 9C-D). Importantly, BMDCs infected with 2001Pm (Sb<sup>S</sup>LD) for 24 hours exhibited a significant reduction in both percentage of infected BMDCs and intracellular parasite number only when treated with 40 but not 20  $\mu$ g/ml of SAG (Figure S10). Treatment of these 2001Pm (Sb<sup>S</sup>LD)-infected BMDCs with Wort or Ly blocked the leishmanicidal effects of SAG (40  $\mu$ g/ml) (Figure S10). In contrast to 2001Pm (Sb<sup>S</sup>LD)-infected BMDCs, SAG-induced leishmanicidal effects were not observed in 39Pm (Sb<sup>R</sup>LD)-infected BMDCs regardless of duration of infection and dose of SAG (Figures 9C-D and S10). In addition, BMDC infection for 3 hours with 2001Pm-MRPA, unlike 2001Pm (Sb<sup>S</sup>LD), partly but significantly suppressed SAG-induced leishmanicidal effects (Figure 9E-F). Collectively, these data demonstrate that blockade of PI3K/AKT pathway by Sb<sup>R</sup>LD impairs SAG-induced NF- $\kappa$ B signaling, DC activation and leishmanicidal function and that is IL-10-independent. Furthermore, these inhibitory effects of Sb<sup>R</sup>LD are partly contributed by MRPA.

### Inhibition of NF- $\kappa$ B activation by Sb<sup>R</sup>LD suppresses SAG-stimulated murine $\gamma$ GCS heavy-chain gene expression in DC

Previous studies have demonstrated an association of antimony resistance of leishmanial parasite with  $\gamma$ GCS heavy-chain ( $\gamma$ GCS<sub>hc</sub>) gene expression of host [4]. The latter encodes the catalytic subunit of  $\gamma$ GCS [32]. In fact, a comparative analysis demonstrated that SAG-induced murine  $\gamma$ GCS<sub>hc</sub> (m $\gamma$ GCS<sub>hc</sub>) expression was unaffected in 2001Pm (Sb<sup>S</sup>LD)-infected BMDCs but selectively inhibited in 39Pm (Sb<sup>R</sup>LD)-infected BMDCs (Figure 10A). The molecular basis for Sb<sup>R</sup>LD-mediated suppression of m $\gamma$ GCS<sub>hc</sub> expression in DC was then explored. Despite SAG stimulation, the inhibition of m $\gamma$ GCS<sub>hc</sub> expression could be due to suppression of NF- $\kappa$ B activation in Sb<sup>R</sup>LD-infected BMDC. To investigate this possibility, the regulatory role of NF- $\kappa$ B in m $\gamma$ GCS<sub>hc</sub> promoter activity was initially ascertained. An approximately 1.0 kb DNA sequence upstream of the transcriptional start site of m $\gamma$ GCS<sub>hc</sub> gene (*Mus musculus* chromosome 9 genomic contig, NT\_039474.7; GI:149260095) was selected as the promoter region using Ensembl and UCSC browsers. The m $\gamma$ GCS<sub>hc</sub> promoter was found to contain a putative NF- $\kappa$ B binding site <sup>-904</sup>GGGGAACTT<sup>-895</sup> that differs from the consensus sequence GGGRNNYYCC at positions 7, 9 and 10 (Figure 10B). ChIP analysis demonstrated that SAG treatment of BMDCs induced NF- $\kappa$ B binding to -991/-673 region of m $\gamma$ GCS<sub>hc</sub> promoter that includes the sequence <sup>-904</sup>GGGGAACTT<sup>-895</sup> (Figure 10B-C). Furthermore, DNA binding of NF- $\kappa$ B complexes consisting of p50, RelB and p65 subunits specifically to the sequence <sup>-904</sup>GGGGAACTT<sup>-895</sup> in SAG-treated BMDCs was confirmed via EMSA using m $\gamma$ GCS<sub>hc</sub> probes containing wild-type sequence <sup>-904</sup>GGGGAACTT<sup>-895</sup> (WT-m $\gamma$ GCS<sub>hc</sub> probe) or



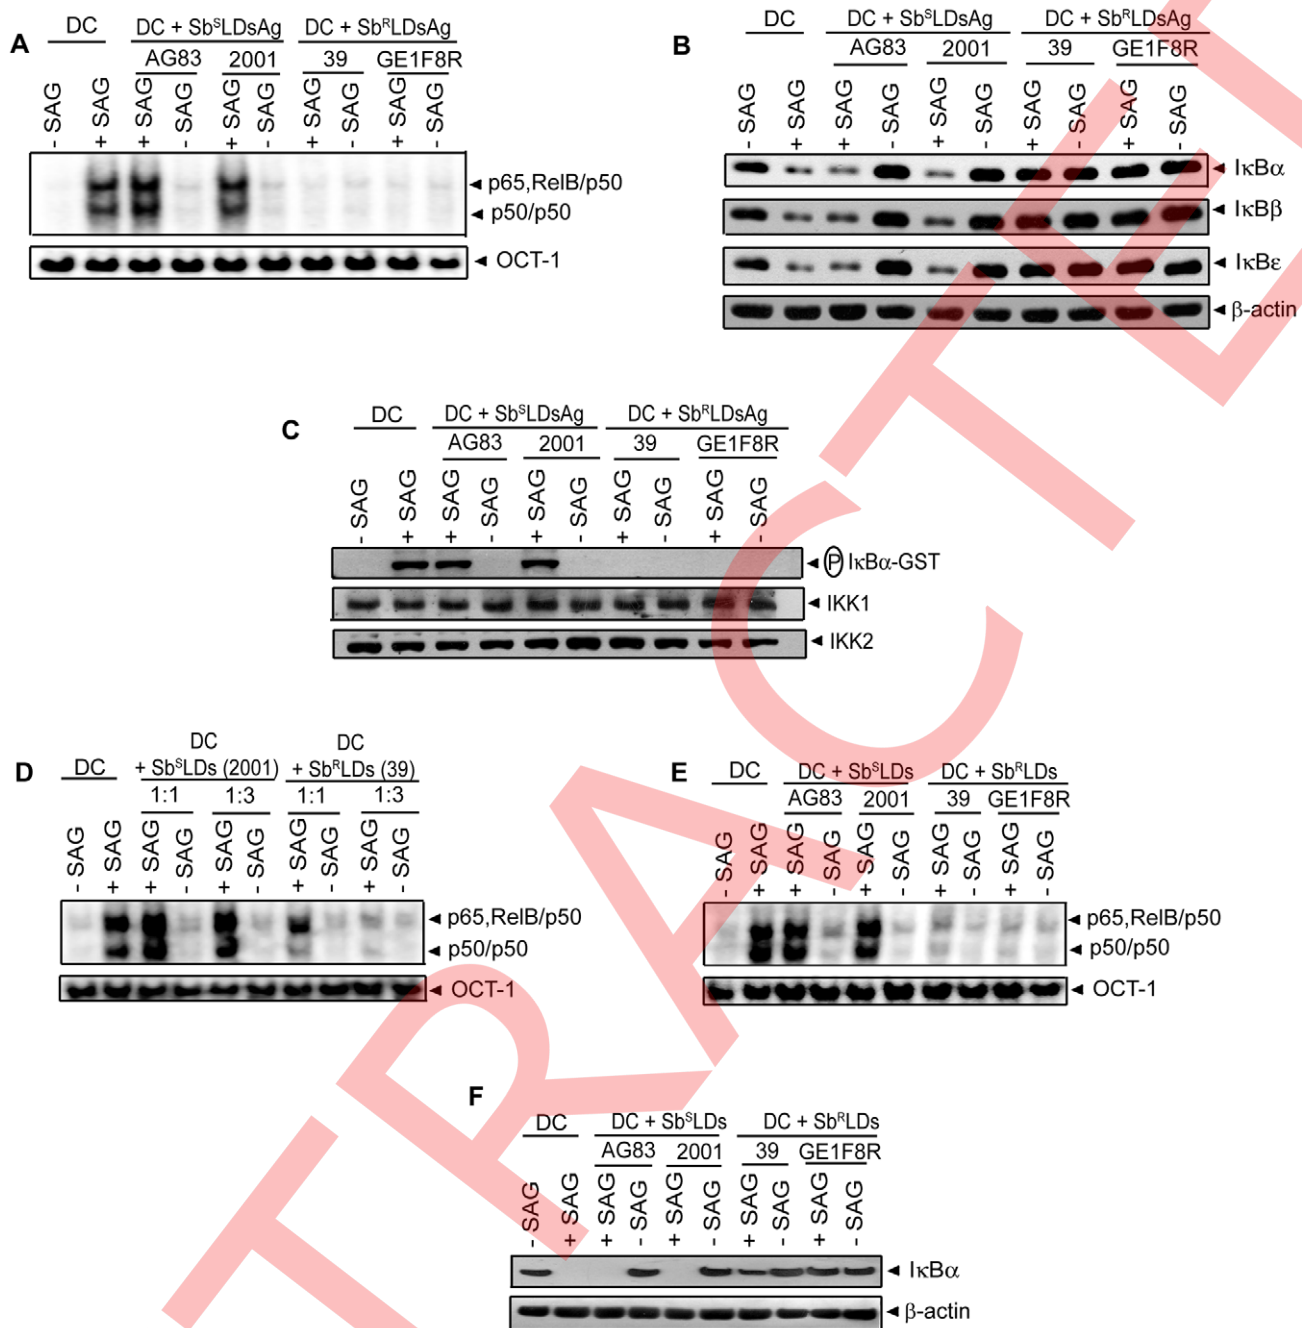

**Figure 5. DC pretreatment with antigens or culture supernatant of Sb<sup>R</sup>LD inhibits SAG-induced NF-κB pathway.** BMDCs were either pretreated with antigens prepared from indicated strains of Sb<sup>S</sup>LD (Sb<sup>S</sup>LDsAg) or Sb<sup>R</sup>LD (Sb<sup>R</sup>LDsAg) (A-C) or cultured in RPMI 1640 complete medium containing culture supernatants of indicated strains of Sb<sup>S</sup>LD (Sb<sup>S</sup>LDs) or Sb<sup>R</sup>LD (Sb<sup>R</sup>LDs) at a complete medium to supernatant ratios of 1:1 (D) or 1:3 (D-F) for 3 hours. BMDCs were then washed and stimulated with SAG (20 μg/ml) for 0.3 hours. (A, D-E) Nuclear NF-κB binding to H2K-DNA probe or OCT-1 DNA binding was measured via EMSA. (B, F) Cytoplasmic IκBα, IκBβ, IκBε and β-actin expression were detected by Western blot using the same blot. (C) *In vitro* IKK activity was determined as in Figure 3 and the same blot was reprobed for IKK1 and IKK2 protein. Data are representative of three independent experiments.  
doi:10.1371/journal.ppat.1000907.g005

mutant sequence <sup>-904</sup>CTCTAAGAAT<sup>-895</sup> (Mut-mγGCS<sub>hc</sub> probe) (Figure 10D) and supershift analysis (Figure 10E).

Next, the role of NF-κB binding site <sup>-904</sup>GGGGAAGCTT<sup>-895</sup> in regulation of promoter activity of mγGCS<sub>hc</sub> gene was tested via luciferase reporter assay using p987-luc and Mut p987-luc, the reporter constructs of mγGCS<sub>hc</sub> promoter fragment containing wild-type and mutant NF-κB binding site, respectively. Compared

to control vector (pEGFP-C1) transfected cells, expression of NF-κB subunit p65 strongly induced luciferase activity of p987-luc (Figure 10F). This enhanced luciferase activity of p987-luc was completely blocked upon co-transfection with pEGFP-dominant negative IκBα (pEGFP-IκBαΔN) encoding the NF-κB-specific inhibitor, IκBαΔN (Figure 10F). The lack of luciferase activity of Mut p987-luc despite p65 expression (Figure 10F) further

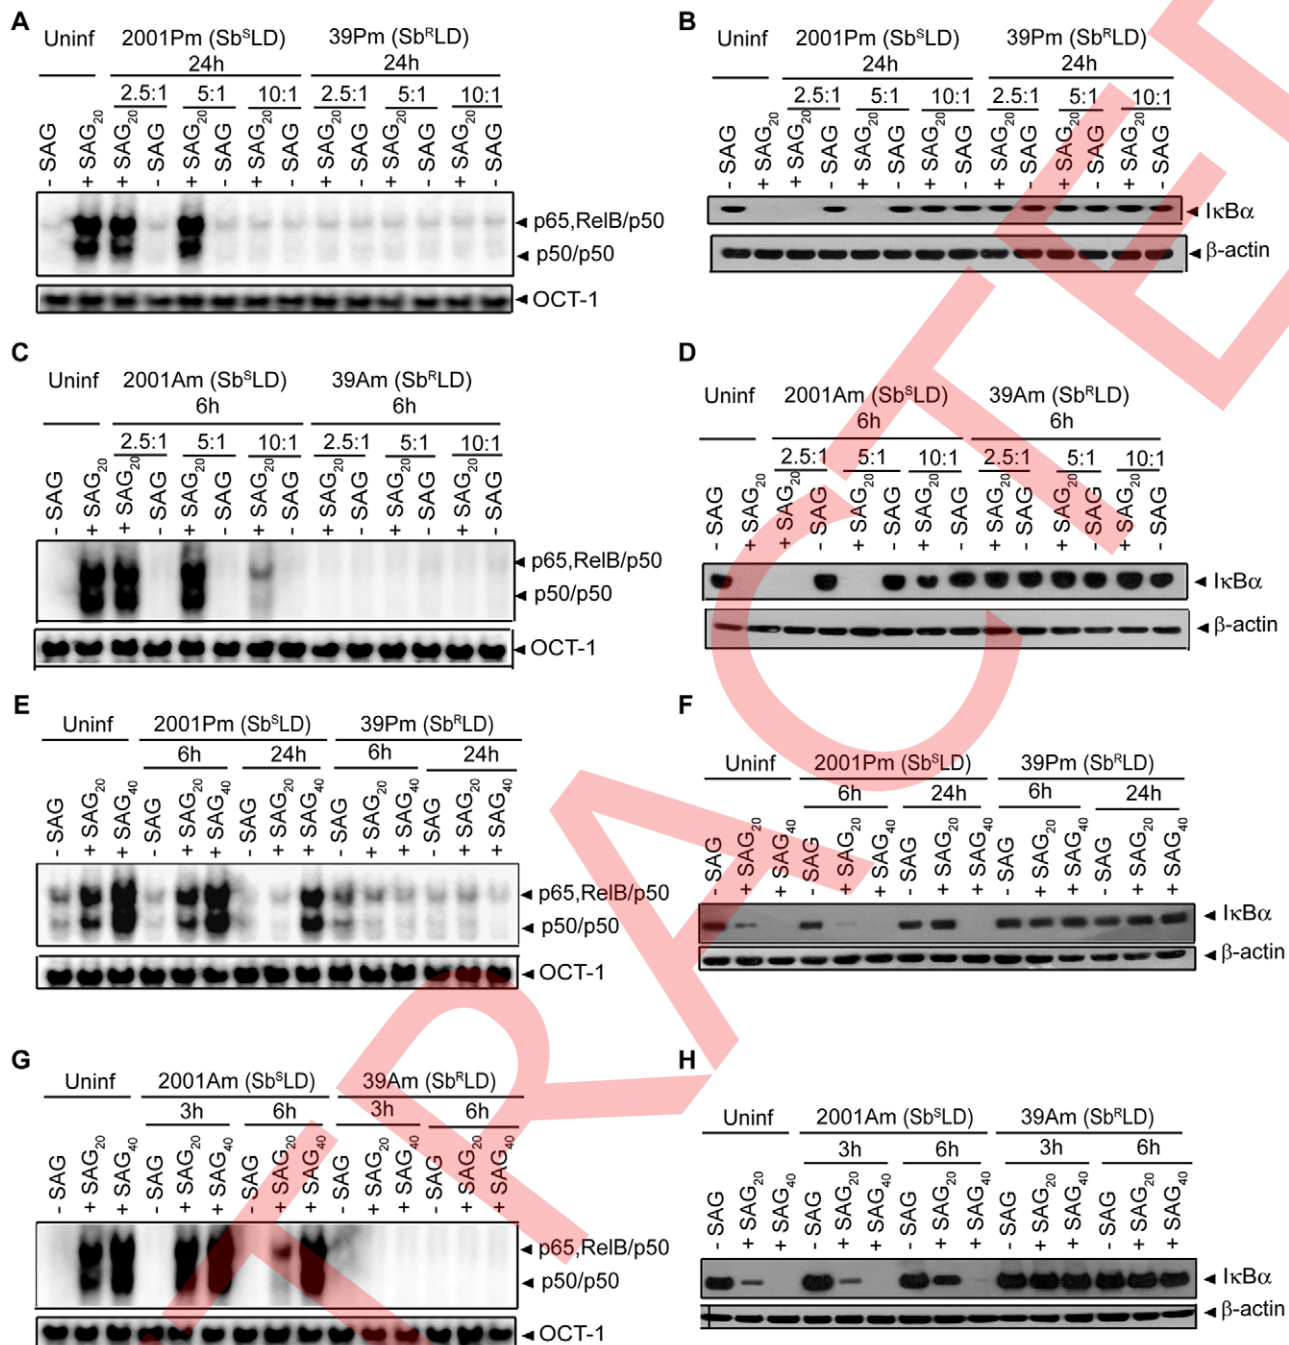

**Figure 6. SAG-induced NF-κB activation is restored in Sb<sup>S</sup>LD- but not Sb<sup>R</sup>LD-infected DCs despite prolonged infection.** BMDCs were infected with promastigotes of 2001 (2001Pm) (Sb<sup>S</sup>LD) and 39 (39Pm) (Sb<sup>R</sup>LD) (A-B, E-F); or amastigotes of 2001 (2001Am) (Sb<sup>S</sup>LD) and 39 (39Am) (Sb<sup>R</sup>LD) (C-D, G-H) for indicated times at MOIs as specified (A-D) or 10:1 (E-H). BMDCs were then stimulated with specified concentrations of SAG for 0.3 hours. (A, C, E, G) Nuclear NF-κB binding to H2K-DNA probe or OCT-1 DNA binding was measured via EMSA. (B, D, F, H) Cytoplasmic IκBα and β-actin expression were detected by Western blot using the same blot. SAG<sub>20</sub> and SAG<sub>40</sub> represent stimulation of BMDCs with 20 and 40 μg/ml of SAG, respectively. Data are representative of three independent experiments. doi:10.1371/journal.ppat.1000907.g006

indicated that the sequence <sup>-904</sup>GGGGAAACTT<sup>-895</sup> is required for NF-κB-mediated transcriptional activation of myGCS<sub>hc</sub> gene. Interestingly, SAG-induced NF-κB DNA binding to WT-myGCS<sub>hc</sub> probe was inhibited in 39Pm (Sb<sup>R</sup>LD)-infected BMDCs (Figure 10G). In contrast, SAG-induced NF-κB DNA binding to WT-myGCS<sub>hc</sub> probe was readily detected in 2001Pm (Sb<sup>S</sup>LD)-infected BMDCs (Figure 10G). These findings suggest that Sb<sup>R</sup>LD

suppresses SAG-induced myGCS<sub>hc</sub> expression in DC by inhibiting NF-κB DNA binding to the myGCS<sub>hc</sub> promoter.

## Discussion

Antimonial drugs activate innate effector cells to promote an anti-leishmanial effect [25]. However, regulation of antimonial

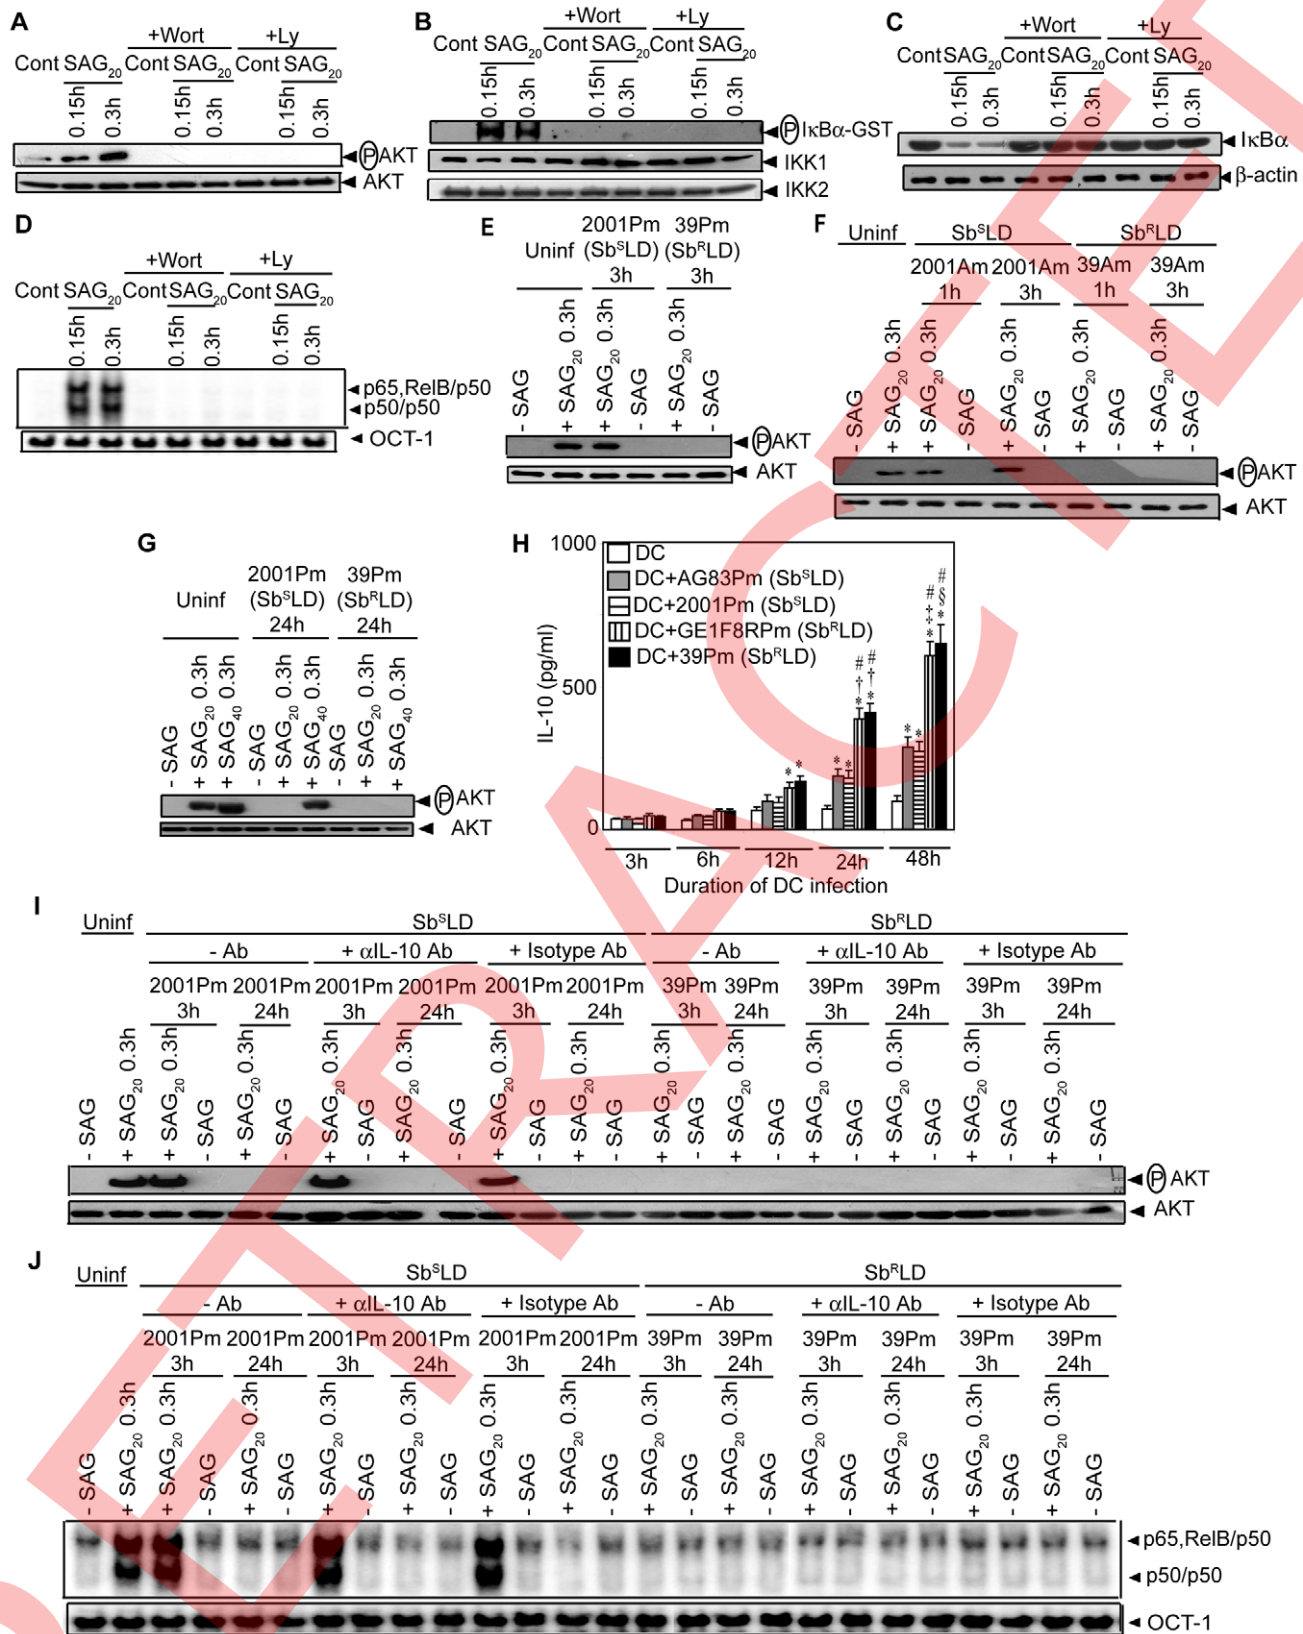

**Figure 7. PI3K/AKT suppression by Sb<sup>R</sup>LD inhibits SAG-induced NF- $\kappa$ B signaling in an IL-10 independent manner.** BMDs were infected with promastigotes of Sb<sup>S</sup>LD strains 2001(2001Pm) (E, G-J) and AG83 (AG83Pm) (H), and Sb<sup>R</sup>LD strains 39 (39Pm) (E, G-J) and GE1F8R (GE1F8Pm) (H); or amastigotes of 2001(2001Am) and 39 (39Am) (F) for indicated times or left uninfected as described in Figure 4. Subsequently, BMDs were stimulated or not with 20 (A-J) or 40 (G)  $\mu\text{g/ml}$  of SAG for specified times. For experiments (A-D), uninfected BMDs were treated with 200 nM Wort or 50  $\mu\text{M}$  Ly for 1 hour prior to SAG stimulation. In some experiments (I-J), BMDs infected with 2001Pm (Sb<sup>S</sup>LD) or 39Pm (Sb<sup>R</sup>LD) for 3 or 24 hours were treated with



10  $\mu\text{g/ml}$  of neutralizing  $\alpha\text{IL-10}$  mAb or isotype control Ab as described in Materials and Methods section or left untreated, and stimulated with SAG. (A, E-G, I) AKT phosphorylation in cytoplasmic extract was determined via Western blot and the same blot was reprobed for AKT protein. (B) *In vitro* IKK activity was measured as in Figure 3. IKK1 and IKK2 protein expression were determined via Western blot using the same blot. (C) Cytoplasmic  $\text{I}\kappa\text{B}\alpha$  and  $\beta$ -actin were detected by Western blot with the same blot. (D, J) Nuclear DNA binding activity of NF- $\kappa\text{B}$  to H2K-DNA probe or OCT-1 DNA binding was determined via EMSA. (H) Secretion of IL-10 was measured via ELISA. SAG<sub>20</sub> and SAG<sub>40</sub> represent stimulation of BMDCs with 20 and 40  $\mu\text{g/ml}$  of SAG, respectively. Data are representative of three independent experiments. \* $p < 0.005$  versus DC; † $p < 0.005$ , ‡ $p = 0.006$  and § $p = 0.007$  versus DC+AG83Pm; # $p < 0.005$  versus DC+2001Pm of respective times (Student's *t* test). Error bars indicate mean  $\pm$  SD. doi:10.1371/journal.ppat.1000907.g007

drug-mediated immune activation by  $\text{Sb}^{\text{R}}\text{LD}$  and  $\text{Sb}^{\text{S}}\text{LD}$  is ill-defined. This is of particular interest in view of the lack of efficacy of antimonial compounds reported for SAG-unresponsive kala-azar patients. Recent studies indicated that DCs play a key role in regulating anti-leishmanial immune response [12–14,33]. Accordingly, the role of SAG in activation of DCs, its regulation by  $\text{Sb}^{\text{R}}\text{LD}$  and  $\text{Sb}^{\text{S}}\text{LD}$  and the molecular mechanism involved therein were investigated. Here we provide evidence that  $\text{Sb}^{\text{R}}\text{LD}$  and  $\text{Sb}^{\text{S}}\text{LD}$  differentially regulate activation of DCs. Furthermore, SAG-induced signaling pathway associated with DC activation is selectively targeted by  $\text{Sb}^{\text{R}}\text{LD}$  infection.

In an agreement with an earlier report [28], both BMDCs and *ex vivo* sDCs were infected *in vitro* with LD promastigotes (Figure 1A). The “SAG-resistant” phenotype did not significantly affect the efficiency of LD infection, but did impact the susceptibility of LD to the leishmanicidal effects of SAG. In contrast, SAG treatment significantly impaired DC infectivity of  $\text{Sb}^{\text{S}}\text{LD}$  including reduction in both intracellular parasite number and percentage of infected DCs (Figures 1B and S1). The differential response of  $\text{Sb}^{\text{R}}\text{LD}$  and  $\text{Sb}^{\text{S}}\text{LD}$  towards SAG treatment was also noted in their ability to regulate activation and maturation of DCs. In contrast to  $\text{Sb}^{\text{S}}\text{LD}$ ,  $\text{Sb}^{\text{R}}\text{LD}$  infection

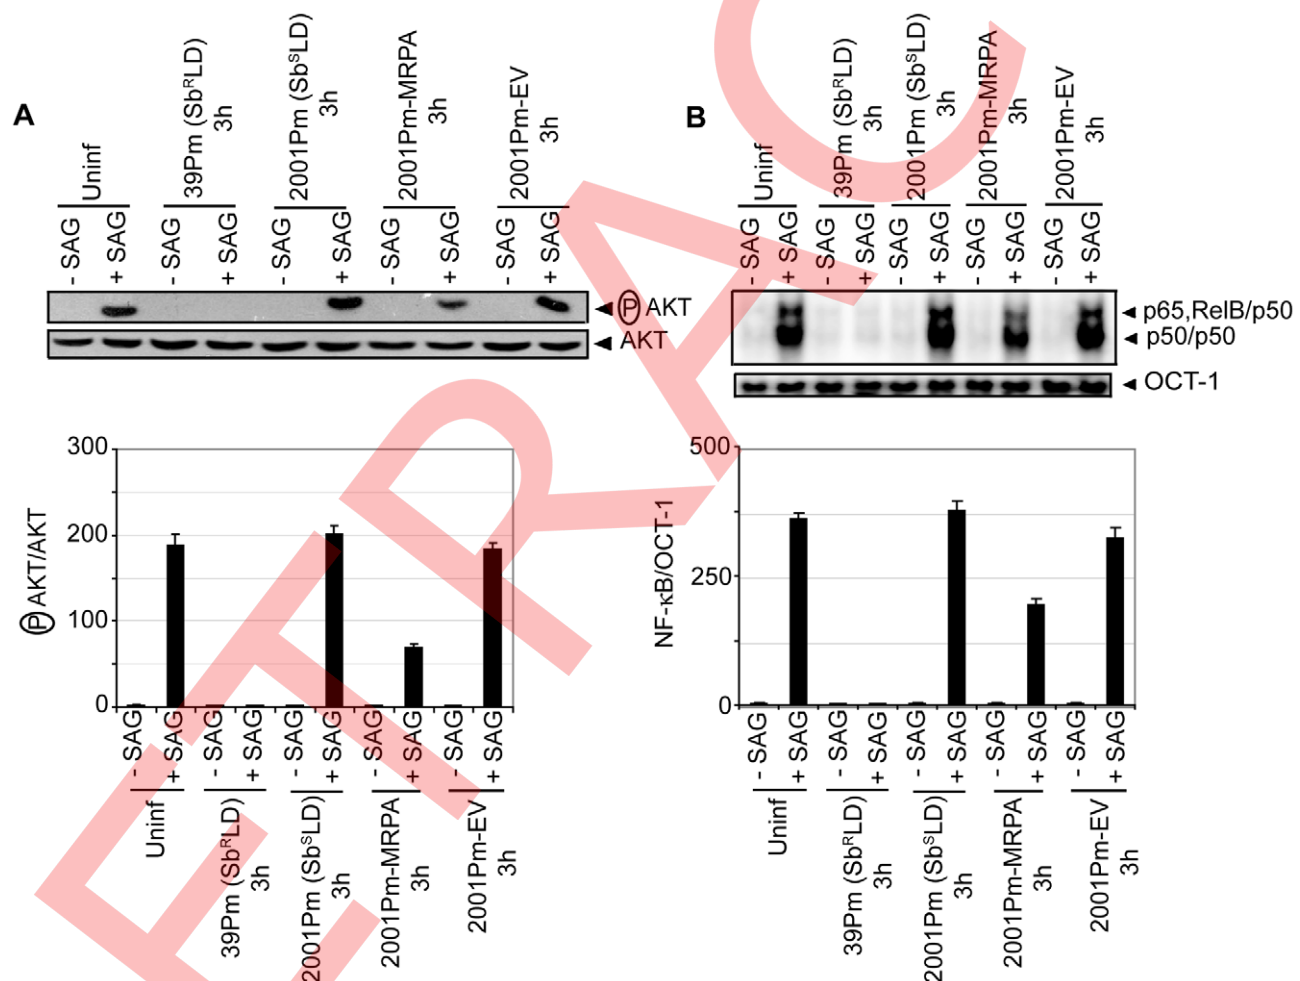

**Figure 8. 2001Pm-MRPA but not 2001Pm inhibits SAG-induced AKT phosphorylation and DNA binding activity of NF- $\kappa\text{B}$ .** BMDCs were infected for 3 hours with 2001Pm ( $\text{Sb}^{\text{S}}\text{LD}$ ), 39Pm ( $\text{Sb}^{\text{R}}\text{LD}$ ), 2001Pm expressing MRPA (2001Pm-MRPA) or 2001Pm transfected with empty vector (2001Pm-EV) and stimulated with 20  $\mu\text{g/ml}$  of SAG as described in Figure 4. (A) Expression of phosphorylated (P) AKT and AKT were measured in whole cell lysates via Western blot using the same membrane. Densitometric readings represent the ratio of intensity of phosphorylated (P) AKT protein to AKT expression per unit area and are represented as arbitrary units. (B) Nuclear NF- $\kappa\text{B}$  and OCT-1 DNA binding activities were measured via EMSA. Densitometric analysis represents the ratio of intensity of NF- $\kappa\text{B}$  to OCT-1 binding per unit area and is represented as arbitrary units. Data are representative of two independent experiments. Error bars indicate mean  $\pm$  SD. doi:10.1371/journal.ppat.1000907.g008

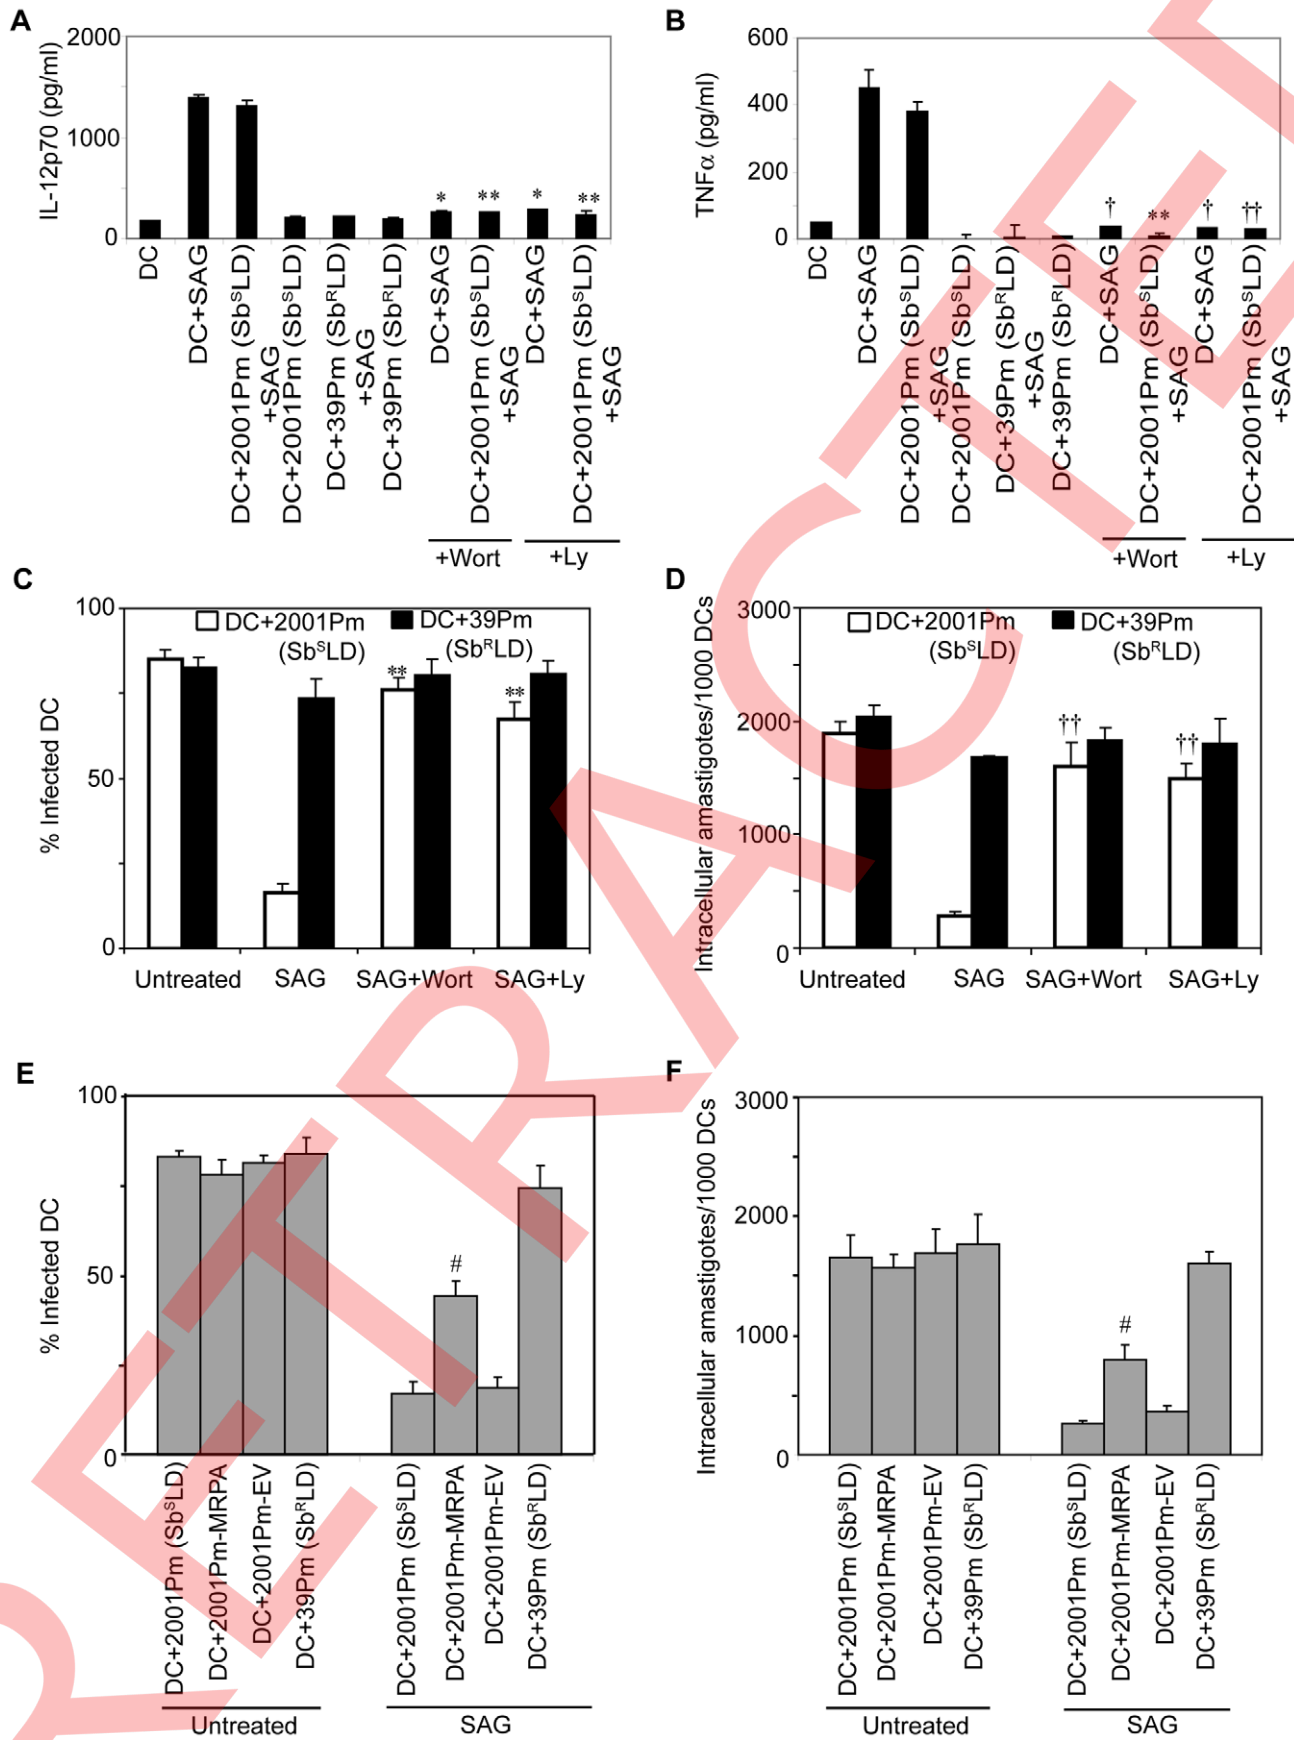

**Figure 9. Sb<sup>R</sup>LD inhibits SAG-induced proinflammatory cytokine production and leishmanicidal effects by suppressing PI3K/AKT pathway.** BMDCs were infected for 3 hours with Sb<sup>R</sup>LD strain 39Pm (A-F); Sb<sup>R</sup>LD strain 2001Pm (A-F); 2001Pm expressing MRPA (2001Pm-MRPA) (E-F); or 2001Pm transfected with empty vector (2001Pm-EV) (E-F) or left uninfected as described in Figure 4. BMDCs were washed and then stimulated with SAG (20 µg/ml) for 48 (A-B) or 24 (C-F) hours. For experiments (A-D); uninfected BMDCs (A-B), and BMDCs infected with 2001Pm (Sb<sup>S</sup>LD) (A-D) or 39Pm (Sb<sup>R</sup>LD) (C-D) were treated with 200 nM Wort or 50 µM Ly for 1 hour prior to SAG treatment. (A-B) Secretion of IL-12 (A) and TNFα (B) were determined by ELISA. (C-F) Giemsa staining was performed to determine the percentage of infected BMDCs (C, E) and number of intracellular amastigotes per 1000 BMDCs (D, F). Data are representative of three independent experiments. \*p<0.001 and †p<0.005 versus DC+SAG; \*\*p<0.001 and ††p<0.005 versus DC+2001Pm+SAG; #p<0.04 versus DC+2001Pm (Sb<sup>S</sup>LD) or DC+2001Pm-EV (Student's t test). Error bars indicate mean ± SD. doi:10.1371/journal.ppat.1000907.g009

inhibited SAG-induced proinflammatory cytokine secretion and up-regulation of co-stimulatory molecule and MHC expression in DCs (Figures 1D-F and S2B-C). Noteworthy is that Sb<sup>R</sup>LD induced increased IL-10 secretion by DCs compared to Sb<sup>S</sup>LD (Figures 1C and S2A). This finding reinforces the inherent ability of Sb<sup>R</sup>LD and Sb<sup>S</sup>LD to differentially immunoregulate DC activation. Previous studies demonstrated that IL-10, a potent suppressor of anti-leishmanial immunity, minimizes responsiveness to SAG [34,35]. Therefore, increased IL-10 production may play a critical role in disease pathogenesis in the host infected with Sb<sup>R</sup>LD.

The second important finding arising from this study is that both promastigotes and amastigotes of Sb<sup>R</sup>LD and Sb<sup>S</sup>LD differentially regulate SAG-induced NF-κB activation in DCs. Indeed, Sb<sup>R</sup>LD but not Sb<sup>S</sup>LD infection blocks SAG-induced NF-κB signaling by suppressing IKK activation, and IκB protein phosphorylation and degradation (Figures 4 and S4). In this regard, it should be noted that SAG stimulation of uninfected DCs induced concomitant degradation of all three IκB proteins (Figure 3A), although degradation of IκBε generally occurs with delayed kinetics upon cellular activation [36,37]. This finding, however, is consistent with a number of studies reporting rapid degradation of IκBβ and IκBε depending on the type of cell and the nature of the stimulation [19,20,36–39]. Nevertheless, the suppression of SAG-induced IκB protein degradation by Sb<sup>R</sup>LD ultimately impaired nuclear NF-κB DNA binding activity (Figures 4 and S4). Surprisingly, BMDC infection at a MOI 10:1 with Sb<sup>S</sup>LD promastigotes or amastigotes for 24 or 6 hours, respectively, also inhibited SAG (20 µg/ml)-induced NF-κB activation (Figure 4). SAG (20 µg/ml)-induced NF-κB activation was restored in these BMDCs but not Sb<sup>R</sup>LD-infected BMDCs upon lowering the MOIs (<10:1) for BMDC infection, which established reduced levels of intracellular parasite number compared to MOI 10:1 (Figures 6A-D and S6). This finding suggests that intracellular parasite number plays a critical role for differential regulation of SAG-induced NF-κB activation by Sb<sup>R</sup>LD and Sb<sup>S</sup>LD. The early inhibition of NF-κB activation in Sb<sup>S</sup>LD amastigote versus promastigote-infected BMDCs (Figure 4) is in agreement with the fact that DCs internalize amastigotes more efficiently than promastigotes [40–42]. However, Sb<sup>R</sup>LD and Sb<sup>S</sup>LD still retain their ability to differentially regulate SAG-induced NF-κB activation in BMDCs with high intracellular parasite number. This conclusion is supported by results demonstrating that despite stimulation with 40 µg/ml of SAG, NF-κB activation was blocked in BMDCs infected for above durations with Sb<sup>R</sup>LD amastigotes or promastigotes at a MOI 10:1 but readily observed in BMDCs infected similarly with Sb<sup>S</sup>LD (Figure 6). Here, the SAG dose was increased from 20 to 40 µg/ml keeping in mind that SAG therapy requires multiple dosing schedules to ensure enough antimony accumulation in tissues of kala-azar patients [43]. Furthermore, equivalent and/or increased concentrations of SAG have previously been used by other groups [44,45]. Under identical conditions, the recurrence of NF-κB activation in Sb<sup>S</sup>LD-infected BMDCs by increasing the dose of SAG from 20 to 40 µg/ml (Figure 6) further suggested that

20 µg/ml of SAG was insufficient to activate NF-κB in these BMDCs due to high intracellular parasite number.

Noteworthy is that the inhibitory effect on NF-κB activation was not dependent on live Sb<sup>R</sup>LD. For instance, parasite antigens derived from Sb<sup>R</sup>LD (Sb<sup>R</sup>LDsAg) and Sb<sup>R</sup>LD culture supernatant (Sb<sup>R</sup>LDs) but not the Sb<sup>S</sup>LD-derived antigens (Sb<sup>S</sup>LDsAg) or culture supernatant of Sb<sup>S</sup>LD (Sb<sup>S</sup>LDs) efficiently inhibited SAG-induced NF-κB activation (Figure 5). These findings suggest that the inhibition of NF-κB activation is specific for Sb<sup>R</sup>LD/Sb<sup>R</sup>LD-derived antigen(s)/factor(s) secreted by Sb<sup>R</sup>LD. Strikingly, the inhibition of NF-κB activation correlated with suppression of SAG-induced DC activation by Sb<sup>R</sup>LD infection (Figures 1, 4 and S2). Studies involving gene transfer of a modified IκBα recombinant into immature DC demonstrated that blockade of NF-κB activation alone prevents up-regulation of co-stimulatory molecule expression and production of proinflammatory cytokines [16,18]. Based on these reports coupled with our own observations, we conclude that the Sb<sup>R</sup>LD blocks SAG-induced NF-κB signaling to prevent DC activation and maturation.

Our results further suggest that Sb<sup>R</sup>LD inhibits IKK and NF-κB activation by blocking SAG-induced PI3K/AKT signaling. SAG stimulation of DCs induced PI3K activation as measured by phosphorylation of AKT, a downstream signaling mediator of PI3K (Figures 7A and S7). Blockade of PI3K/AKT activation by Wort or Ly completely suppressed SAG-stimulated IKK activity and NF-κB signaling (Figure 7A-D), indicating a direct involvement of the PI3K/AKT pathway in NF-κB activation by SAG in DCs. Importantly, PI3K/AKT activation is negatively regulated by Src homology phosphotyrosine phosphatase (SHP)-1, which dephosphorylates PI3K [46]. Furthermore, SHP-1 activity is inhibited by SAG [47]. Therefore, blockade of SHP-1 activity by SAG may indirectly promote PI3K phosphorylation and activation of downstream AKT, IKK and NF-κB in DCs. Similar to uninfected DCs, SAG treatment induced PI3K/AKT activation in DCs infected with Sb<sup>S</sup>LD promastigotes for 3 hours and Sb<sup>S</sup>LD amastigotes for 1 and 3 hours (Figures 7E-F and S7). Importantly, PI3K inhibitors impaired SAG (20 µg/ml)-induced NF-κB pathway, DC activation and leishmanicidal effects in BMDCs infected with Sb<sup>S</sup>LD promastigotes for 3 hours (Figures 9 and S11). These results suggest the inability of Sb<sup>S</sup>LD to regulate SAG-induced PI3K/AKT and NF-κB pathways. Consequently, SAG continues to exhibit leishmanicidal effects in Sb<sup>S</sup>LD-infected DCs. The inability of Sb<sup>S</sup>LD to regulate SAG-induced leishmanicidal effects was maintained despite BMDC infection for 24 hours with Sb<sup>S</sup>LD promastigotes. This was apparent when increased dose of SAG (40 µg/ml) was used for treatment (Figure S10). In fact, treatment with 40 µg/ml of SAG restored AKT phosphorylation and therefore exhibited leishmanicidal effects in a PI3K-dependent manner in these Sb<sup>S</sup>LD-infected BMDCs (Figures 7G and S10). Interestingly, Sb<sup>R</sup>LD infection mimicked the effects of the PI3K inhibitors in that all SAG-induced events as mentioned above were also blocked by Sb<sup>R</sup>LD regardless of duration of infection, form of parasite and dose of SAG (Figures 7, 9, S10 and S11). One intriguing possibility is that IL-10 produced by Sb<sup>R</sup>LD-infected DCs mediated Sb<sup>R</sup>LD-induced suppression of PI3K/



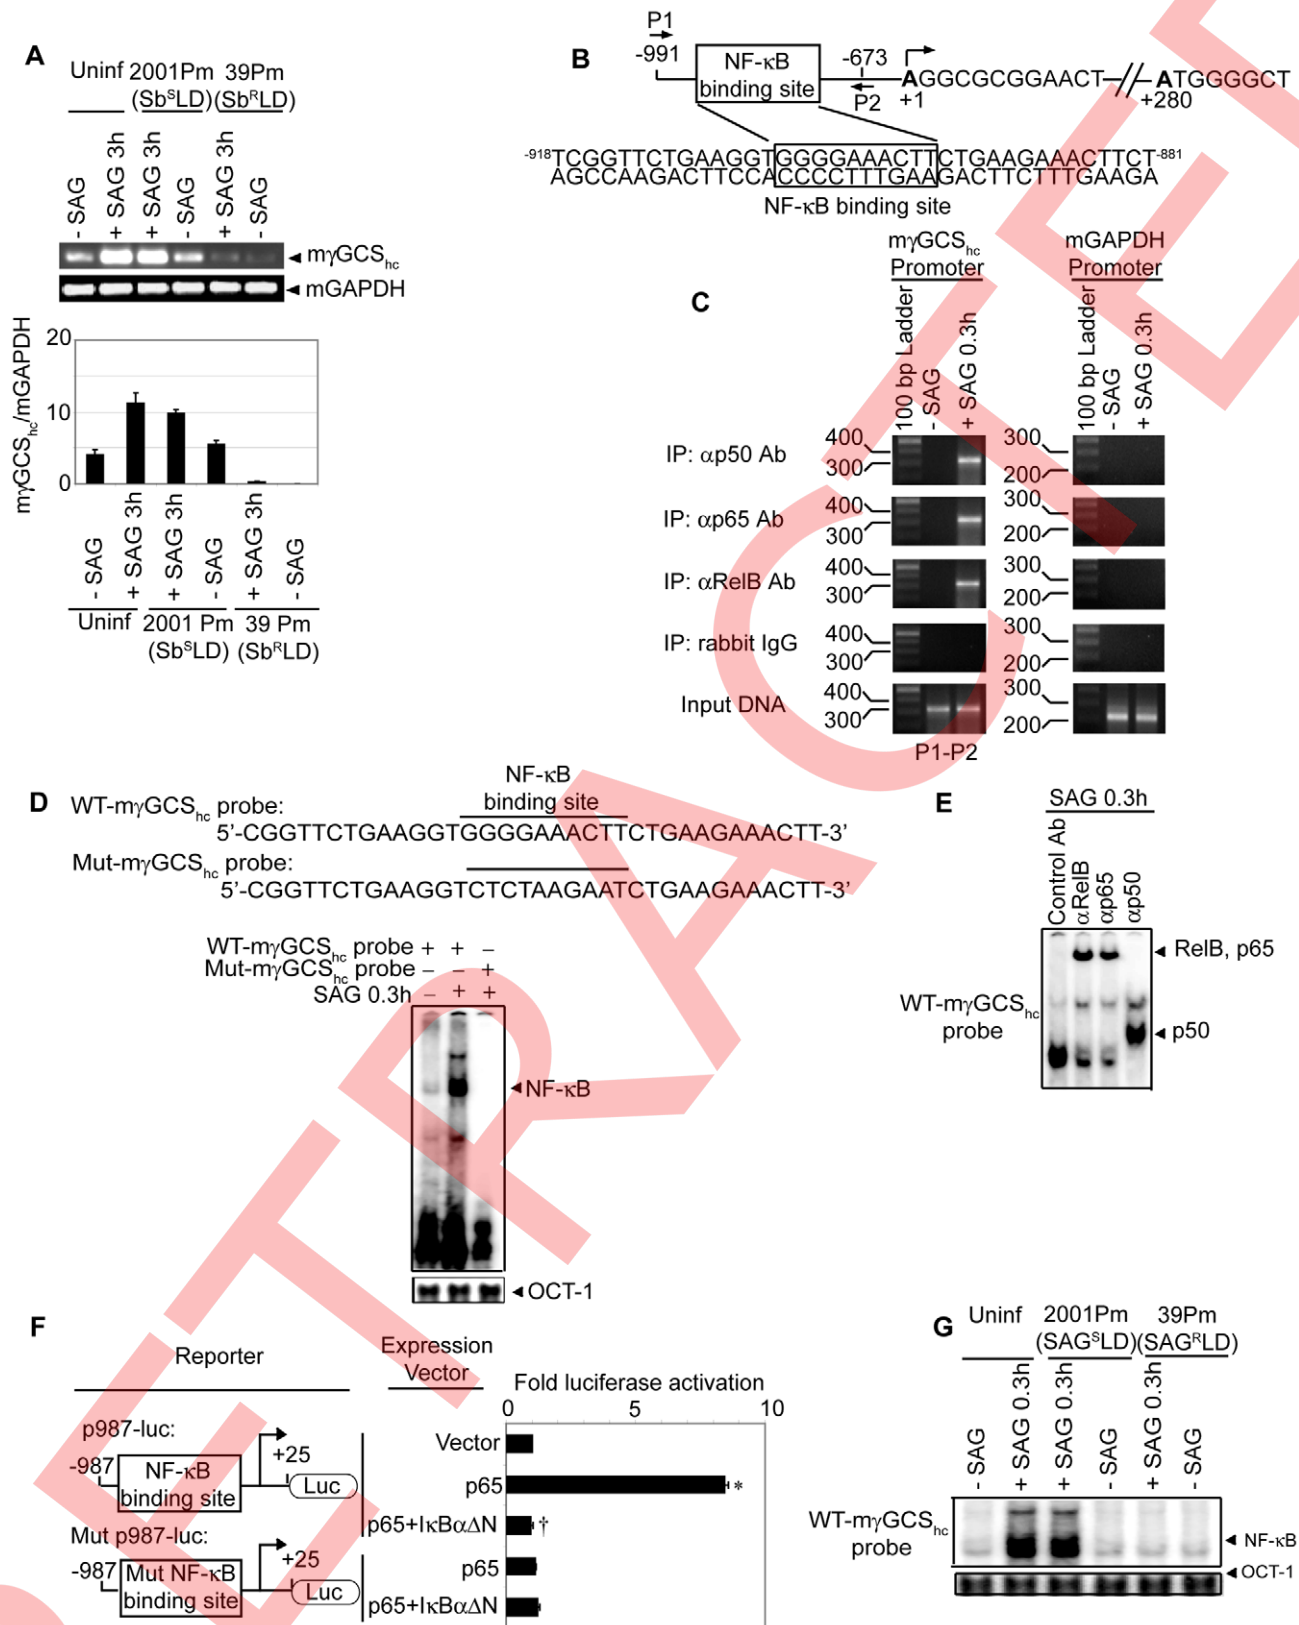

**Figure 10. Suppression of SAG-induced myGCS<sub>hc</sub> expression by Sb<sup>R</sup>LD is NF-κB-dependent.** Both uninfected BMDCs (A, C-E, G) and BMDCs infected with 2001Pm (Sb<sup>S</sup>LD) or 39Pm (Sb<sup>R</sup>LD) for 3 hours (A, G) were stimulated with SAG (20 μg/ml) for specified times as in Figure 4. (A) The mRNA expression of myGCS<sub>hc</sub> versus mGAPDH was determined via RT-PCR. Densitometric data represent ratio of intensity of myGCS<sub>hc</sub> to mGAPDH mRNA expression per unit area and are presented as an arbitrary unit. (B) Schematic presentation of myGCS<sub>hc</sub> promoter indicating the position of NF-κB binding site and ChIP primers (P1, P2). (C) NF-κB binding to -991/-673 region of myGCS<sub>hc</sub> promoter was examined by ChIP using

the primers shown in B and indicated Abs. Amplification of mGAPDH promoter and chromatin immunoprecipitated by rabbit IgG were used as negative controls, and input DNA (2%) as an internal control. (D, G) Nuclear NF- $\kappa$ B DNA binding to  $\gamma$ GCS<sub>hc</sub> promoter-specific probes containing wild-type NF- $\kappa$ B binding site (WT- $\gamma$ GCS<sub>hc</sub> probe) (D, G) or mutant NF- $\kappa$ B binding site (Mut- $\gamma$ GCS<sub>hc</sub> probe) (D) was determined via EMSA. OCT-1 DNA binding activity was used as internal control. (E) DNA binding of different NF- $\kappa$ B complexes to WT- $\gamma$ GCS<sub>hc</sub> probe was determined via supershift analysis using rabbit IgG (Control Ab) or Abs specific for indicated NF- $\kappa$ B subunits. (F) NF- $\kappa$ B-mediated regulation of  $\gamma$ GCS<sub>hc</sub> promoter activity was determined by reporter assay. NIH3T3 cells were co-transfected with *Renilla* luciferase vector (pRL-CMV) and firefly luciferase reporter plasmid containing  $\gamma$ GCS<sub>hc</sub> promoter with wild-type (p987-luc) or mutant (Mut p987-luc) NF- $\kappa$ B binding site. In addition, all co-transfections contained pEGFP-C1 empty vector or pEGFP-p65 and/or pEGFP-I $\kappa$ B $\alpha$ ΔN. Twenty-four hours later, firefly and *Renilla* luciferase activities in cell lysates were measured. The data represent the fold induction of firefly/*Renilla* luciferase activity ratio relative to pEGFP-C1-transfected cells. Data are representative of three independent experiments. \* $p < 0.001$  versus NIH3T3+p987-luc+pEGFP-C1 and † $p < 0.001$  versus NIH3T3+p987-luc+pEGFP-p65 (Student's *t* test). Error bars indicate mean  $\pm$  SD.  
doi:10.1371/journal.ppat.1000907.g010

AKT and NF- $\kappa$ B pathways (Figures 1C, 4, 7, S2A and S7). This correlation can be made because IL-10 inhibits AKT activation and NF- $\kappa$ B pathway in DCs [19]. Furthermore, the inhibitory effects of IL-10 on DCs can be mediated in an autocrine manner [48]. However, this is unlikely since SAG-induced NF- $\kappa$ B activation was inhibited even in BMDCs infected with Sb<sup>R</sup>LD for 1 and 3 hours, when IL-10 production was not detected (Figures 4 and 7H). Moreover, neutralization of IL-10 produced by BMDCs upon Sb<sup>R</sup>LD infection for 24 hours failed to block Sb<sup>R</sup>LD-induced inhibition of PI3K/AKT and NF- $\kappa$ B pathways (Figure 7H-J). Therefore, Sb<sup>R</sup>LD infection of BMDCs for up to 24 hours inhibits SAG-induced PI3K/AKT and NF- $\kappa$ B pathways in an IL-10-independent manner and eventually impairs DC activation.

Another key finding is that the suppression of NF- $\kappa$ B activation by Sb<sup>R</sup>LD but not Sb<sup>S</sup>LD inhibits not only DC activation but also SAG-induced  $\gamma$ GCS<sub>hc</sub> expression in DC (Figure 10). Importantly, regulation of host  $\gamma$ GCS<sub>hc</sub> expression and therefore host GSH level by Sb<sup>R</sup>LD plays a key role for antimony resistance in LD infection [4]. Although regulation of  $\gamma$ GCS<sub>hc</sub> expression by NF- $\kappa$ B was shown in a murine M $\phi$ -like cell line by blocking NF- $\kappa$ B activation [27], our observation establishes a direct role for NF- $\kappa$ B in mediating the promoter activity of the  $\gamma$ GCS<sub>hc</sub> gene (Figure 10C-F). Interestingly, Sb<sup>R</sup>LD blocked SAG-induced  $\gamma$ GCS<sub>hc</sub> expression in DC by preventing NF- $\kappa$ B binding to the  $\gamma$ GCS<sub>hc</sub> gene promoter (Figure 10G). This suggests a key role for NF- $\kappa$ B in Sb<sup>R</sup>LD-mediated suppression of  $\gamma$ GCS<sub>hc</sub> expression in DC. Our findings (Figures 10A and S12) are consistent with the recent work by Carter and colleagues demonstrating that Sb<sup>R</sup>LD transcriptionally down-regulate host  $\gamma$ GCS<sub>hc</sub> expression and up-regulate their own  $\gamma$ GCS<sub>hc</sub> (LD- $\gamma$ GCS<sub>hc</sub>) expression [4]. Whereas Sb<sup>R</sup>LD-induced inhibition of host  $\gamma$ GCS expression reduces host GSH level and impairs reduction of Sb<sup>V</sup> to toxic Sb<sup>III</sup> form; elevated expression of LD  $\gamma$ GCS by Sb<sup>R</sup>LD restores GSH level that promotes efflux of SAG and confers protection against oxidative stress [4].

The mechanism of antimony resistance in clinical LD isolates is unknown and may differ from laboratory-derived resistant parasites [3]. The true markers of clinical antimony resistance in LD isolates are still lacking [2]. A gene, PG1, is reported to confer antimony resistance in clinical isolates of LD [45,49]. In addition, enhanced expression of several other genes including MRPA and proteophosphoglycans (PPG) was demonstrated in antimony-resistant compared to antimony-sensitive field isolates (Salotra P, Singh R, Nakhasi H. 2005. Clinical Microbiology and Infection. Vol 11, Suppl 2: 47) [5,50]. As an initial effort to determine whether any Sb<sup>R</sup>LD-specific factor(s) mediated the suppression of SAG-induced NF- $\kappa$ B signaling and leishmanicidal effects in DCs, the role for MRPA was investigated. Results obtained using 2001Pm and its isogenic strain expressing MRPA (2001Pm-MRPA) showed that the inhibitory effect of 2001Pm-MRPA on SAG-induced PI3K/AKT and NF- $\kappa$ B pathways and leishmani-

cidal activities mimics that of Sb<sup>R</sup>LD to some extent (Figures 8 and 9). However, the real bearing of this observation in naturally occurring antimony-resistant LD isolates is still questionable and needs detailed investigation further. Moreover, the effects of SAG are likely to be inhibited in DCs by other Sb<sup>R</sup>LD-specific factor(s) also. The relative contribution of these parasite-specific factors in Sb<sup>R</sup>LD-mediated suppression of DC activation is currently under investigation. Furthermore, an association of antimony resistance with genetic variation among LD strains has been proposed [51]. Recent studies demonstrated that due to high genetic polymorphism, strain 39 is remarkably distinct not only from antimony-sensitive strain 2001 but also from other antimony-resistant clinical LD isolates exhibiting homology with antimony-sensitive parasites [51]. On the other hand, the antimony-sensitive strains 2001 and Dd8 exhibit significant genetic similarity [51]. The extreme genetic polymorphism might be a potential cause of antimony resistance in strain 39 [51]. These reports together with our findings emphasize the notion that antimony resistance of clinical LD isolates is "multifactorial" [3].

SAG unresponsiveness in kala-azar patients also entails a number of host-regulated events including dominance of a type-2 T cell response and altered host gene expression [3,4,8,9]. Our findings demonstrate that SAG treatment induces PI3K-dependent NF- $\kappa$ B activation in DCs, which is blocked by Sb<sup>R</sup>LD but not Sb<sup>S</sup>LD infection. Dysregulation of SAG-induced NF- $\kappa$ B activation favors persistent survival of Sb<sup>R</sup>LD in DCs despite SAG treatment by: 1) inhibiting NF- $\kappa$ B-dependent  $\gamma$ GCS expression, a key mediator of Sb<sup>V</sup> reduction to Sb<sup>III</sup>, and 2) preventing DC activation and maturation required for the initiation of the anti-leishmanial immune response. Notably, a heterogeneous response to SAG treatment may be observed in humans. This possibility is raised by a report demonstrating that SAG treatment of monocyte-derived DCs restores their capacity to respond to LPS in ~60% of type 1 diabetes patients [52]. Importantly, some variability in SAG responsiveness is also reported in kala-azar patients [53]. It is speculated that the genetic differences among individuals may influence the response following SAG therapy in the patients infected with same *Leishmania* species and living in the same endemic area [54]. Further studies are needed to define how genetic variation, if any, influences the outcome of SAG treatment in kala-azar patients.

## Materials and Methods

### Animals

BALB/c mice and golden hamsters (*Mesocricetus auratus*) were maintained and bred under pathogen-free conditions.

### Ethics statement

Use of both mice and hamsters was approved by the Institutional Animal Ethics Committees of Institute of Microbial Technology and Indian Institute of Chemical Biology, India. All

animal experimentations were performed according to the National Regulatory Guidelines issued by CPSEA (Committee for the Purpose of Supervision of Experiments on Animals), Ministry of Environment and Forest, Govt. of India.

### Parasite cultures and preparation of soluble antigen from LD

Sb<sup>R</sup>LD [GE1F8R (MHOM/IN/89/GE1), 39, R5] and Sb<sup>S</sup>LD [AG83 (MHOM/IN/83/AG83), 2001] strains are gifts from Dr. Neeloo Singh (Central Drug Research Institute, India) and Dr. Shyam Sundar (Banaras Hindu University, India) and were maintained in golden hamsters as described [45,55–57]. Amastigotes were obtained from spleens of infected hamsters as described [58]. Subsequently, amastigotes were transformed into promastigotes and maintained as described [59]. GFP-2001 and GFP-R5 are gifts from Dr. Neeloo Singh and were maintained in M199 complete medium (10% FBS, penicillin/streptomycin) with 720 µg/ml geneticin disulfate (G418) (Sigma, St. Louis, MO) [60]. Soluble antigens were prepared from Sb<sup>S</sup>LD and Sb<sup>R</sup>LD promastigotes (10<sup>9</sup>/ml) as described [59].

### Transfection of 2001Pm

2001Pm (Sb<sup>S</sup>LD) at mid log or stationary phase were washed twice with electroporation buffer (21 mM HEPES, pH 7.05; 137 mM NaCl; 5 mM KCl; 0.7 mM NaH<sub>2</sub>PO<sub>4</sub>; 6 mM glucose). The promastigotes were resuspended in ice-cold electroporation buffer to a final concentration of 10<sup>7</sup>/ml. An aliquot (400 µl) of parasite suspension was mixed with 35–40 µg of chilled pGEM 7ZF  $\alpha$ -neo- $\alpha$  *L. tarentolae* MRPA or pGEM 7ZF  $\alpha$ -neo- $\alpha$  DNA (kind gifts from Dr. Marc Ouellette, Laval University, Canada), transferred to a 2-mm gap cuvette and electroporated using BIO-RAD Gene-Pulser X cell instrument at 450 V and 500 µF (3.5 to 4 milli-seconds pulse time). After electroporation, parasites were immediately placed on ice for 10 minutes and cultured at 22°C for 24 hours in Schneider's insect medium with 1500 µg/ml paromomycin and 10 µM Bioplerin. Subsequently, 40 µg/ml of G418 was added to the parasite culture. After 24 hours, 1 ml of this promastigote culture was transferred to a new flask containing 5 ml of fresh medium with 10 µM bioplerin and 120 µg/ml G418. The culture was maintained for one month under drug pressure (once per week) to obtain the stable transfectants. The mRNA expression of MRPA in these stable transfectants was verified via RT-PCR.

### DC preparation

BMDCs and sDCs were prepared from male or female BALB/c mice between 8–12 weeks of age as described [19]. Flow cytometric analyses indicated >85% and ~90% purity of BMDCs and sDCs, respectively, based on CD11c expression.

### DC infection with promastigotes or amastigotes of LD

DCs (5×10<sup>6</sup>/well) were infected *in vitro* at specified MOIs either with amastigotes of Sb<sup>R</sup>LD or Sb<sup>S</sup>LD; or promastigotes of stationary phase Sb<sup>R</sup>LD, Sb<sup>S</sup>LD or respective GFP-LD for indicated times in a 6-well plate in RPMI 1640 complete medium (10% FBS, penicillin/streptomycin, L-glutamine, sodium pyruvate, non-essential amino acids, 2-mercaptoethanol). Subsequently, DCs were washed, resuspended in RPMI 1640 complete medium and stimulated with SAG (10, 20 and 40 µg/ml) of clinical grade or sodium gluconate (25, 50, 100 and 200 µg/ml) for specified times. The doses of SAG mentioned here and for all experiments represent the concentration of Sb<sup>V</sup>. DC infection with GFP-Sb<sup>R</sup>LD or GFP-Sb<sup>S</sup>LD was determined via flow cytometry.

SAG containing 20 µg/ml of Sb<sup>V</sup>, and 35 µg/ml of sodium gluconate had equivalent molar concentration. Sodium gluconate was purchased from Acros Organics, New Jersey, USA. SAG was obtained as kind gift from Albert David Ltd., Kolkata, India. For other experiments, DCs (2.5×10<sup>5</sup>/ml) were adhered on 22×22 mm cover slips, infected with promastigotes/amastigotes of Sb<sup>S</sup>LD or Sb<sup>R</sup>LD and treated with SAG for indicated times. The number of intracellular parasites in DCs was determined via Giemsa staining. In some experiments, DCs (5×10<sup>6</sup>/well) were infected with Sb<sup>S</sup>LD or Sb<sup>R</sup>LD promastigotes for 3 hours or left uninfected. Alternatively, infection of DCs (5×10<sup>6</sup>/well) with LD promastigotes was done for specified times. DCs were then treated or not with Wort (200 nM) or Ly (50 µM) (Cell Signaling Technology, Beverly, MA) 1 hour prior to SAG stimulation as described [19]. In some cases, DCs (5×10<sup>6</sup>/well) were infected with Sb<sup>S</sup>LD or Sb<sup>R</sup>LD promastigotes for 3 and 24 hours or left uninfected. Neutralizing  $\alpha$ IL-10 monoclonal Ab (10 µg/ml)/isotype control rat IgG2<sub>b</sub> Ab (10 µg/ml) (BD Biosciences, San Jose, CA) were added at 2<sup>nd</sup> hour of BMDC infection. After infection, DCs were washed and stimulated with SAG for 0.3 hours.

### DC pretreatment with soluble antigens/culture supernatant of LD or IL-10

DCs (5×10<sup>6</sup>/well) were pretreated for 3 hours with 50 µg/ml soluble antigens derived from Sb<sup>R</sup>LD (Sb<sup>R</sup>LDsAg) or Sb<sup>S</sup>LD (Sb<sup>S</sup>LDsAg) and stimulated with SAG for 0.3 hours in a 6-well plate. Alternatively, Sb<sup>R</sup>LD or Sb<sup>S</sup>LD promastigotes (10<sup>6</sup>/ml) were grown in M199 complete medium till the parasite concentration reached  $\geq 10^7$ /ml. The respective culture supernatants of Sb<sup>R</sup>LD (Sb<sup>R</sup>LDs) and Sb<sup>S</sup>LD (Sb<sup>S</sup>LDs) were then collected. Subsequently, DCs (5×10<sup>6</sup>/well) were cultured for 3 hours in RPMI 1640 complete medium containing Sb<sup>R</sup>LDs or Sb<sup>S</sup>LDs at specified complete medium to supernatant ratios and stimulated with SAG for 0.3 hours as above. In some experiments, BMDCs (5×10<sup>6</sup>/well) were pretreated with murine IL-10 (50 ng/ml) (PeproTech, Rocky Hill, NJ) for 24 hours as described [19], in the presence or absence of 10 µg/ml of  $\alpha$ IL-10Ab/isotype control Ab and stimulated with LPS (500 ng/ml) for 0.5 hours.

### EMSA and Western blot

Nuclear and cytoplasmic extracts were prepared from DC as described [61]. EMSA was performed as described [62] using <sup>32</sup>P-labeled DNA probes containing NF- $\kappa$ B binding sites derived from MHC-I H2K promoter:

5'-CAGGGCTGGGGATTCCCCATCTCCACAGTTT-CACTTC-3' [20]. In some experiments, DNA probes specific for murine  $\gamma$ GCS heavy-chain (m $\gamma$ GCS<sub>hc</sub>) promoter containing wild-type or mutant NF- $\kappa$ B binding sites as represented by WT-m $\gamma$ GCS<sub>hc</sub> probe, 5'-CGGTTCTGAAGGTGGGGAACTTCT-GAAGAACTT-3' and Mut-m $\gamma$ GCS<sub>hc</sub> probe, 5'-CGGTTCTGAAGGTCTCTAAGAACTTCTGAAGAACTT-3' (NF- $\kappa$ B binding site is underlined and mutated bases are in italics) respectively, were used. A double stranded OCT-1 DNA probe, 5'-TGTCGAATGCAAATCACTAGAA-3' was used as control. Supershift EMSAs were carried out as described [19] using following Abs:  $\alpha$ p50,  $\alpha$ RelB (Active Motif, CA);  $\alpha$ p65 (Abcam plc, Cambridge, UK);  $\alpha$ p52,  $\alpha$ cRel, rabbit IgG (Santa Cruz Biotechnology, Santa Cruz, CA). Bands were visualized using a phosphorimager (Bio-Rad Molecular Imager FX, Hercules, CA).

Western blotting was carried out as described [20]. Blots were probed with Abs specific for: IkB $\alpha$ , IkB $\beta$ , IkB $\epsilon$ , IKK1, IKK2 (Santa Cruz Biotechnology); pIkB $\alpha$ , pIKK1 (Ser180)/pIKK2 (Ser181), pAKT (Ser473), AKT, pSAPK/JNK (Thr183/Tyr185),



SAPK/JNK, phospho-p38MAPK (Thr180/Tyr182), p38MAPK, pERK1/pERK2 (Thr202/Tyr204), ERK1/ERK2 (Cell Signaling Technology);  $\beta$ -actin (Sigma). Binding of secondary HRP-labeled goat- $\alpha$ rabbit (Santa Cruz Biotechnology) or goat- $\alpha$ mouse Abs (Sigma) was analyzed using SuperSignal<sup>R</sup> West Pico or West Dura Chemiluminescent Substrate (Pierce, Rockland, IL).

#### IKK assay

IKK signalosome was immunoprecipitated from 700  $\mu$ g of a whole DC lysate using Protein A/G agarose beads (Santa Cruz Biotechnology) and rabbit polyclonal  $\alpha$ IKK1 Ab. *In vitro* kinase reaction was performed and kinase activity of immunoprecipitated IKK complex determined as described [20].

#### Flow cytometry

The following monoclonal antibodies used for flow cytometry were purchased from eBioscience (San Diego, CA): PE- $\alpha$ mouse CD11c, FITC- $\alpha$ mouse CD11b, FITC- $\alpha$ mouse CD40, FITC- $\alpha$ mouse CD86, FITC- $\alpha$ mouse CD80, FITC- $\alpha$ mouse H2K<sup>d</sup> and FITC- $\alpha$ mouse IA<sup>d</sup>. The fluorescence of stained cells was analyzed on a FACSCalibur (BD Biosciences) using Cell Quest Pro software.

#### Measurement of IL-12, TNF $\alpha$ and IL-10 secretions from DCs

DCs ( $1 \times 10^6$ /ml) were infected with promastigotes of Sb<sup>R</sup>LD or Sb<sup>S</sup>LD for 3 hours or left uninfected, washed and stimulated with SAG for additional 48 hours in a 24-well plate. Alternatively, DCs ( $1 \times 10^6$ /ml) were infected with promastigotes of Sb<sup>R</sup>LD or Sb<sup>S</sup>LD for varying times or left uninfected. The culture supernatants were analyzed for IL-12, TNF $\alpha$  and IL-10 productions in triplicate using ELISA kits (BD Biosciences) following the manufacturer's instructions.

#### Analysis of murine $\gamma$ GCS heavy-chain ( $m\gamma$ GCS<sub>hc</sub>) and LD $\gamma$ GCS heavy-chain (LD- $\gamma$ GCS<sub>hc</sub>) expression in Sb<sup>R</sup>LD- and Sb<sup>S</sup>LD-infected BMDCs

BMDCs ( $5 \times 10^6$ /well) were infected with Sb<sup>R</sup>LD or Sb<sup>S</sup>LD for 3 hours or left uninfected, stimulated with SAG for 3 hours and RNA prepared using RNeasy minikit reagent (QIAGEN). The mRNA expression of  $m\gamma$ GCS<sub>hc</sub>, LD- $\gamma$ GCS<sub>hc</sub>, murine glyceraldehyde-3-phosphate dehydrogenase (mGAPDH) and LD-tubulin genes were determined via reverse transcription-PCR using platinum quantitative RT-PCR ThermoScript One Step system kit (Invitrogen, Carlsbad, CA), and primers: LD- $\gamma$ GCS<sub>hc</sub> 5'-TATCAAGTCTCGCTACGACT-3', 5'-CGGAGTCCTTCAGAGTT-3'; LD-tubulin 5'-ACATCAGCAACTCGGTGTTT-3', 5'-TTGCTCTTGATCGTCGCAAT-3';  $m\gamma$ GCS<sub>hc</sub> 5'-AGAACAATCGCTTTAGGATCA-3', 5'-AGAAGATGATC-GATGCCTTC-3'; mGAPDH 5'-AGATTGTTGCCATCAAC-GAC 3', 5'-ATGACAAGCTTCCCATTCTC-3' [4].

#### Detection of MRPA expression in LD

RNA was isolated from LD promastigotes and mRNA expression of MRPA was detected by analyzing the amplification of 179 bp cDNA fragment of MRPA via reverse transcription-PCR using primers: 5'-GCGCAGCCGTTTGTGCTTGTGG-3', 5'-TTGCCGTACGTCGCGATGGTGC-3' [5]. mRNA expression of LD-tubulin was used as loading control.

#### Chromatin immunoprecipitation (ChIP)

BMDCs ( $5 \times 10^6$ /well) were stimulated with SAG for 0.3 hours or left untreated. ChIP was performed using ChIP-IT kit (Active

Motif) following the manufacturer's instructions. After immunoprecipitation using rabbit IgG or NF- $\kappa$ B Abs such as  $\alpha$ p50,  $\alpha$ RelB and  $\alpha$ p65, followed by DNA extraction; PCR was performed to amplify -991/-673 region of  $m\gamma$ GCS<sub>hc</sub> promoter using primers: P1, 5'-CCAGTTCCCAGAGCCTTCCG-3' and P2, 5'-TTGTACGACTCCACATGGCATG-3'. For a negative control, mGAPDH promoter was amplified by using primers: 5'-CACCTGGCATTCTTCTTCCA-3 and 5'-GACCCAGAGACCTGAATGCTG-3' [63].

#### Reporter assay

An approximately 1.0 kb (-987/+25) long 5'-flanking sequence of  $m\gamma$ GCS<sub>hc</sub> gene was amplified by PCR using murine genomic DNA (Promega, Madison, WI) and cloned into pGL3-Basic vector. Using this resulting construct, p987-luc, and a Quick-ChangeII PCR-based site-directed mutagenesis kit (Stratagene, Cedar Creek, TX); the construct (Mut p987-luc) containing a mutant NF- $\kappa$ B binding site, similar to that described in EMSA studies, in -987/+25 region of  $m\gamma$ GCS<sub>hc</sub> promoter was generated. Both constructs were confirmed by sequencing. NIH3T3 cells were transiently transfected with a DNA mixture containing p987-luc or Mut p987-luc (0.266  $\mu$ g), pRL-CMV (0.200  $\mu$ g), pEGFP-p65 (0.266  $\mu$ g) and/or pEGFP-Ik $\beta$  $\Delta$ N (Ik $\beta$  with amino acids 1-36 deleted) (0.266  $\mu$ g) using lipofectamine LTX (Invitrogen). The latter two expression vectors are gifts from Dr. Johannes Schmid (Medical University of Vienna, Austria) and Dr. Susan Kandarian (Boston University, USA) respectively [64,65]. The DNA amount in each transfection was kept constant. Cells were grown for 24 hours after transfection. The luciferase activity of the cell lysates was determined using Dual Luciferase Reporter Assay System (Promega) and GLOMAX luminometer (Promega) following the manufacturer's instructions. The level of luciferase activity was normalized to the level of *Renilla* luciferase activity.

#### Supporting Information

**Figure S1** BMDC infection with AG83Pm but not 39Pm is inhibited by SAG treatment. BMDCs were infected *in vitro* at MOI 10:1 with AG83Pm (Sb<sup>S</sup>LD) or 39Pm (Sb<sup>R</sup>LD) for 3 hours and stimulated with SAG (10 and 20  $\mu$ g/ml) for 24 and 48 hours as described in Figure 1. Untreated (24h) and untreated (48h) represent LD-infected DC controls cultured without SAG treatment for 24 and 48 hours, respectively. The percentage of infected BMDCs (A) and number of intracellular amastigotes per 1000 BMDCs (B) were determined by Giemsa staining. Open and solid bars represent AG83Pm and 39Pm-infected BMDCs, respectively. Data are representative of three independent experiments. \* $p < 0.001$ , \*\* $p = 0.003$ , † $p = 0.002$  and †† $p = 0.0012$  versus DC+AG83Pm of respective times (Student's *t* test). Error bars indicate mean  $\pm$  SD.

Found at: doi:10.1371/journal.ppat.1000907.s001 (1.94 MB TIF)

**Figure S2** Sb<sup>S</sup>LD and Sb<sup>R</sup>LD differentially regulate cytokine secretion by sDCs. *Ex vivo* derived sDCs were infected with 2001Pm (Sb<sup>S</sup>LD) or 39Pm (Sb<sup>R</sup>LD) for 3 hours or left uninfected. sDCs were then washed to remove free parasites and stimulated with SAG (20  $\mu$ g/ml) for 48 hours as in Figure 1. Production of (A) IL-10, (B) IL-12p70 and (C) TNF $\alpha$  in the culture supernatants were measured via ELISA. Data are representative of three independent experiments. \* $p = 0.004$  and \*\* $p = 0.008$  versus DC+2001; † $p < 0.001$  versus DC+SAG (Student's *t* test). Error bars indicate mean  $\pm$  SD.

Found at: doi:10.1371/journal.ppat.1000907.s002 (1.63 MB TIF)

**Figure S3** SAG treatment induces NF- $\kappa$ B pathway in sDCs. sDCs were stimulated with SAG (20  $\mu$ g/ml) for the specified times or left untreated. (A) EMSA was used to measure DNA binding activity of nuclear NF- $\kappa$ B to H2K-DNA probe. OCT-1 DNA binding was used as internal control. (B) Western blot was used to detect cytoplasmic I $\kappa$ B $\alpha$  and  $\beta$ -actin protein using the same blot. (C) *In vitro* IKK activity was determined as described in Figure 3. Expression of IKK1 and IKK2 were determined via Western blot using same membrane. Data are representative of three independent experiments.

Found at: doi:10.1371/journal.ppat.1000907.s003 (0.94 MB TIF)

**Figure S4** BMDCs and sDCs infection with Sb<sup>R</sup>LD strains GE1F8R and 39, respectively, inhibits SAG-induced NF- $\kappa$ B signaling. sDCs were infected with 2001Pm (Sb<sup>S</sup>LD) or 39Pm (Sb<sup>R</sup>LD) (A, C, E) and BMDCs with AG83Pm (Sb<sup>S</sup>LD) or GE1F8Rpm (Sb<sup>R</sup>LD) (B, D, F) for 3 hours as described in Figure 4. DCs were then washed and stimulated with SAG (20  $\mu$ g/ml) for 0.3 hours. (A-B) Nuclear NF- $\kappa$ B or OCT-1 DNA binding activity was determined via EMSA. (C-D) Cytoplasmic I $\kappa$ B $\alpha$  and  $\beta$ -actin protein were detected by Western blot using the same blot. (E) IKK phosphorylation was detected via Western blot and the same blot was reprobed for IKK1 and IKK2 protein. (F) *In vitro* IKK activity, and IKK1 and IKK2 protein expression were determined as described in Figure 3. Data are representative of three independent experiments.

Found at: doi:10.1371/journal.ppat.1000907.s004 (3.51 MB TIF)

**Figure S5** Temporal analysis of DC infection with Sb<sup>R</sup>LD and Sb<sup>S</sup>LD. BMDCs were infected at a MOI 10:1 with promastigotes (Pm) (A, C) or amastigotes (Am) (B, D) of indicated Sb<sup>R</sup>LD and Sb<sup>S</sup>LD strains for specified times. BMDCs were subsequently washed to remove free parasites. The number of intracellular amastigotes per 1000 BMDCs (A-B) and percentage of infected BMDCs (C-D) were determined by Giemsa staining. Data are representative of three independent experiments. \* $p$ <0.01 versus BMDCs infected with 2001Pm for 6 hours, # $p$ <0.01 versus BMDCs infected with 39Pm for 6 hours, † $p$ = 0.014 versus BMDCs infected with 2001Am for 3 hours and †† $p$ = 0.011 versus BMDCs infected with 39Am for 3 hours (Student's *t* test). Error bars indicate mean  $\pm$  SD.

Found at: doi:10.1371/journal.ppat.1000907.s005 (3.38 MB TIF)

**Figure S6** DC infection varies with MOIs at specified time points of infection. BMDCs were infected at varying MOIs either with 2001Pm (Sb<sup>S</sup>LD) or 39Pm (Sb<sup>R</sup>LD) for 24 hours (A, C); or 2001Am (Sb<sup>S</sup>LD) or 39Am (Sb<sup>R</sup>LD) for 6 hours (B, D). BMDCs were then washed. The number of intracellular amastigotes per 1000 BMDCs (A-B) and percentage of infected BMDCs (C-D) were determined by Giemsa staining. Data are representative of three independent experiments. \* $p$ <0.005 versus BMDCs infected with 2001Pm at MOIs 2.5:1 or 5:1 (promastigote:BMDC); # $p$ <0.01 and ## $p$ <0.005 versus BMDCs infected with 39Pm at MOIs 2.5:1 or 5:1 (promastigote:BMDC); † $p$ <0.005 versus BMDCs infected with 2001Am at MOIs 2.5:1 or 5:1 (amastigote:BMDC); \*\* $p$ <0.005 and † $p$ <0.01 versus BMDCs infected with 39Am at MOIs 2.5:1 or 5:1 (amastigote:BMDC) (Student's *t* test). Error bars indicate mean  $\pm$  SD.

Found at: doi:10.1371/journal.ppat.1000907.s006 (3.34 MB TIF)

**Figure S7** Sb<sup>R</sup>LD but not Sb<sup>S</sup>LD infection inhibits SAG-stimulated phosphorylation of AKT in sDCs. *Ex vivo* sDCs were infected with 2001Pm (Sb<sup>S</sup>LD) or 39Pm (Sb<sup>R</sup>LD) for 3 hours at a MOI 10:1 or left uninfected. The sDCs were washed thoroughly and stimulated with SAG (20  $\mu$ g/ml) for 0.3 hours. Expression of phospho-AKT versus AKT in the cytoplasmic extract was

determined via Western blot. Data are representative of two independent experiments.

Found at: doi:10.1371/journal.ppat.1000907.s007 (0.51 MB TIF)

**Figure S8** Treatment with  $\alpha$ IL-10 Ab prevents inhibition of LPS-induced NF- $\kappa$ B DNA binding activity in IL-10-pretreated BMDCs. BMDCs were pretreated with IL-10 (50 ng/ml) for 24 hours in the presence or absence of 10  $\mu$ g/ml of  $\alpha$ IL-10 Ab or isotype control Ab. BMDCs were then washed and stimulated with LPS (500 ng/ml) for 0.5 hours. Nuclear NF- $\kappa$ B binding to H2K-DNA probe or OCT-1 DNA binding was measured via EMSA. Data are representative of two independent experiments.

Found at: doi:10.1371/journal.ppat.1000907.s008 (0.62 MB TIF)

**Figure S9** An increased expression of MRPA is detected in Sb<sup>R</sup>LD and 2001Pm-MRPA but not Sb<sup>S</sup>LD. The mRNA expression of MRPA versus LD-tubulin in Sb<sup>R</sup>LD strains 39Pm and GE1F8Rpm (A); Sb<sup>S</sup>LD strains AG83Pm (A) and 2001Pm (A-B); 2001Pm expressing MRPA (2001Pm-MRPA) (B); and 2001Pm transfected with empty vector (2001Pm-EV) (B) was determined via RT-PCR. Densitometric data represent ratio of intensity of MRPA to LD-tubulin mRNA expression per unit area and are presented as an arbitrary unit. Data are representative of three independent experiments. Error bars indicate mean  $\pm$  SD.

Found at: doi:10.1371/journal.ppat.1000907.s009 (2.76 MB TIF)

**Figure S10** SAG (40  $\mu$ g/ml) treatment restores leishmanicidal effects in Sb<sup>S</sup>LD- unlike Sb<sup>R</sup>LD-infected DCs despite prolonged infection. BMDCs were infected with 2001Pm (Sb<sup>S</sup>LD) or 39Pm (Sb<sup>R</sup>LD) at a MOI of 10:1 for 24 hours. BMDCs were then washed and treated with 200 nM Wort or 50  $\mu$ M Ly for 1 hour. Subsequently, BMDCs were stimulated with 20 or 40  $\mu$ g/ml of SAG for 24 hours or left untreated. The percentage of infected BMDCs (A) and number of intracellular amastigotes per 1000 BMDCs (B) were determined by Giemsa staining. SAG<sub>20</sub> and SAG<sub>40</sub> represent stimulation of BMDCs with 20 and 40  $\mu$ g/ml of SAG, respectively. Data are representative of three independent experiments. \* $p$ <0.005, † $p$ =0.094 and # $p$ = 0.13 versus DC+2001Pm \*\* $p$ <0.005 versus DC+2001Pm+SAG<sub>40</sub> (Student's *t* test). Findings were considered significant with "p" values  $\leq$  0.05. Error bars indicate mean  $\pm$  SD.

Found at: doi:10.1371/journal.ppat.1000907.s010 (1.62 MB TIF)

**Figure S11** Pretreatment with PI3K inhibitors block SAG-induced NF- $\kappa$ B signaling in Sb<sup>S</sup>LD-infected DCs. BMDCs were infected for 3 hours with 2001Pm (Sb<sup>S</sup>LD) and 39Pm (Sb<sup>R</sup>LD) at MOI 10:1, treated with Wort or Ly and stimulated with SAG (20  $\mu$ g/ml) for indicated times as in Figure 8. (A) *In vitro* IKK activity was measured as in Figure 3. The same blot was reprobed for IKK1 and IKK2 protein. (B) Expression of cytoplasmic I $\kappa$ B $\alpha$  and  $\beta$ -actin protein was detected by Western blot using the same blot. (C) Nuclear NF- $\kappa$ B or OCT-1 DNA binding activity was determined via EMSA. Data are representative of three independent experiments.

Found at: doi:10.1371/journal.ppat.1000907.s011 (4.49 MB TIF)

**Figure S12** LD  $\gamma$ GCS heavy-chain (LD- $\gamma$ GCS<sub>hc</sub>) expression is more in Sb<sup>R</sup>LD- compared to Sb<sup>S</sup>LD-infected BMDCs. BMDCs were infected with 2001Pm (Sb<sup>S</sup>LD) or 39Pm (Sb<sup>R</sup>LD) for 3 hours at MOI 10:1. Infected DCs were then stimulated with SAG (20  $\mu$ g/ml) for 3 hours or left untreated. The mRNA expression of LD- $\gamma$ GCS<sub>hc</sub> versus LD-tubulin was determined via RT-PCR. Densitometric data represent ratio of intensity of LD- $\gamma$ GCS<sub>hc</sub> to LD-tubulin mRNA expression per unit area and are presented as an arbitrary unit. Data are representative of three independent experiments. Error bars indicate mean  $\pm$  SD.

Found at: doi:10.1371/journal.ppat.1000907.s012 (1.63 MB TIF)

## Acknowledgments

We thank Neeloo Singh (Central Drug Research Institute, India) and Shyam Sundar (Banaras Hindu University, India) for Sb<sup>R</sup>LD and Sb<sup>S</sup>LD strains; Johannes Schmid (Medical University of Vienna, Austria) for pEGFP-p65 expression vector; Susan Kandarian (Boston University, USA) for pEGFP-IkBaΔN expression vector; and Marc Ouellette (Laval University, Canada) for pGEM 7ZF α-neo-α and pGEM 7ZF α-neo-α *L. tarentolae* MRPA (PGPA) expression vectors. We want to thank Jagmohan Singh (Institute of Microbial Technology, India), who helped in designing the strategies for cloning murine γGCS<sub>hc</sub> promoter and critical reading of the manuscript. Finally, we thank IMTECH and IICB animal house

facilities for providing us animals required for experimentation and Dr. Neeraj Khatri for helping us in carrying out the infection of hamsters with LD via intracardiac route.

## Author Contributions

Conceived and designed the experiments: PS. Performed the experiments: AKH VY ES KKB AS SB RB. Analyzed the data: PS. Contributed reagents/materials/analysis tools: PS SR. Wrote the paper: PS. Contributed to conceptualization of some aspects of antimony resistance in LD infection: SR.

## References

- Lira R, Sundar S, Makharia A, Kenney R, Gam A, et al. (1999) Evidence that the high incidence of treatment failures in Indian kala-azar is due to the emergence of antimony-resistant strains of *Leishmania donovani*. *J Infect Dis* 180: 564–567.
- Croft SL, Sundar S, Fairlamb AH (2006) Drug resistance in leishmaniasis. *Clin Microbiol Rev* 19: 111–126.
- Ashutosh, Sundar S, Goyal N (2007) Molecular mechanisms of antimony resistance in *Leishmania*. *J Med Microbiol* 56: 143–153.
- Carter KC, Hutchison S, Henriquez FL, Legare D, Ouellette M, et al. (2006) Resistance of *Leishmania donovani* to sodium stibogluconate is related to the expression of host and parasite gamma-glutamylcysteine synthetase. *Antimicrob Agents Chemother* 50: 88–95.
- Mukherjee A, Padmanabhan PK, Singh S, Roy G, Girard I, et al. (2007) Role of ABC transporter MRPA, gamma-glutamylcysteine synthetase and ornithine decarboxylase in natural antimony-resistant isolates of *Leishmania donovani*. *J Antimicrob Chemother* 59: 204–211.
- Decuypere S, Rijal S, Yardley V, De Doncker S, Laurent T, et al. (2005) Gene expression analysis of the mechanism of natural Sb(V) resistance in *Leishmania donovani* isolates from Nepal. *Antimicrob Agents Chemother* 49: 4616–4621.
- Carter KC, Sundar S, Spickett C, Pereira OC, Mullen AB (2003) The *in vivo* susceptibility of *Leishmania donovani* to sodium stibogluconate is drug specific and can be reversed by inhibiting glutathione biosynthesis. *Antimicrob Agents Chemother* 47: 1529–1535.
- Thakur CP, Mitra DK, Narayan S (2003) Skewing of cytokine profiles towards T helper cell type 2 response in visceral leishmaniasis patients unresponsive to sodium antimony gluconate. *Trans R Soc Trop Med Hyg* 97: 409–412.
- Narayan S, Bimal S, Singh SK, Gupta AK, Singh VP, et al. (2009) *Leishmania donovani* vs immunity: T-cells sensitized from *Leishmania* of one donor may modulate their cytokines pattern on re-stimulation with *Leishmania* from different donor in visceral leishmaniasis. *Exp Parasitol* 121: 69–75.
- Murray HW, Delph-Etienne S (2000) Roles of endogenous gamma interferon and macrophage microbicidal mechanisms in host response to chemotherapy in experimental visceral leishmaniasis. *Infect Immun* 68: 288–293.
- Murray HW, Montelíbano C, Peterson R, Sypek JP (2000) Interleukin-12 regulates the response to chemotherapy in experimental visceral *Leishmaniasis*. *J Infect Dis* 182: 1497–1502.
- Gorak PM, Engwerda CR, Kaye PM (1998) Dendritic cells, but not macrophages, produce IL-12 immediately following *Leishmania donovani* infection. *Eur J Immunol* 28: 687–695.
- Suzue K, Kobayashi S, Takeuchi T, Suzuki M, Koyasu S (2008) Critical role of dendritic cells in determining the Th1/Th2 balance upon *Leishmania* major infection. *Int Immunol* 20: 337–343.
- Bennett CL, Misslitz A, Colledge L, Aebischer T, Blackburn CC (2001) Silent infection of bone marrow-derived dendritic cells by *Leishmania mexicana* amastigotes. *Eur J Immunol* 31: 876–883.
- Rescigno M, Martino M, Sutherland CL, Gold MR, Ricciardi-Castagnoli P (1998) Dendritic cell survival and maturation are regulated by different signaling pathways. *J Exp Med* 188: 2175–2180.
- Poligone B, Weaver DJ, Jr., Sen P, Baldwin AS, Jr., Tisch R (2002) Elevated NF-kappaB activation in nonobese diabetic mouse dendritic cells results in enhanced APC function. *J Immunol* 168: 188–196.
- Ouaaz F, Arron J, Zheng Y, Choi Y, Beg AA (2002) Dendritic cell development and survival require distinct NF-kappaB subunits. *Immunity* 16: 257–270.
- Weaver DJ, Jr., Poligone B, Bui T, Abdel-Motal UM, Baldwin AS, Jr., et al. (2001) Dendritic cells from nonobese diabetic mice exhibit a defect in NF-kappaB regulation due to a hyperactive IkappaB kinase. *J Immunol* 167: 1461–1468.
- Bhattacharyya S, Sen P, Wallet M, Long B, Baldwin AS, Jr., et al. (2004) Immunoregulation of dendritic cells by IL-10 is mediated through suppression of the PI3K/Akt pathway and of IkappaB kinase activity. *Blood* 104: 1100–1109.
- Sen P, Wallet MA, Yi Z, Huang Y, Henderson M, et al. (2007) Apoptotic cells induce Mer tyrosine kinase-dependent blockade of NF-kappaB activation in dendritic cells. *Blood* 109: 653–660.
- Ghosh S, Karin M (2002) Missing pieces in the NF-kappaB puzzle. *Cell* 109 Suppl: S81–96.
- Karin M (1999) How NF-kappaB is activated: the role of the IkappaB kinase (IKK) complex. *Oncogene* 18: 6867–6874.
- Madrid LV, Wang CY, Guttridge DC, Schottelius AJ, Baldwin AS, Jr., et al. (2000) Akt suppresses apoptosis by stimulating the transactivation potential of the RelA/p65 subunit of NF-kappaB. *Mol Cell Biol* 20: 1626–1638.
- Guha M, Mackman N (2002) The phosphatidylinositol 3-kinase-Akt pathway limits lipopolysaccharide activation of signaling pathways and expression of inflammatory mediators in human monocytic cells. *J Biol Chem* 277: 32124–32132.
- Mookerjee Basu J, Mookerjee A, Sen P, Bhaumik S, Banerjee S, et al. (2006) Sodium antimony gluconate induces generation of reactive oxygen species and nitric oxide via phosphoinositide 3-kinase and mitogen-activated protein kinase activation in *Leishmania donovani*-infected macrophages. *Antimicrob Agents Chemother* 50: 1788–1797.
- Barat C, Zhao C, Ouellette M, Tremblay MJ (2007) HIV-1 replication is stimulated by sodium stibogluconate, the therapeutic mainstay in the treatment of leishmaniasis. *J Infect Dis* 195: 236–245.
- Kurozumi R, Kojima S (2005) Increase of intracellular glutathione by low-level NO mediated by transcription factor NF-kappaB in RAW 264.7 cells. *Biochim Biophys Acta* 1744: 58–67.
- Tejle K, Lindroth M, Magnusson KE, Rasmussen B (2008) Wild-type *Leishmania donovani* promastigotes block maturation, increase integrin expression and inhibit detachment of human monocyte-derived dendritic cells—the influence of phosphoglycans. *FEMS Microbiol Lett* 279: 92–102.
- Marovich MA, McDowell MA, Thomas EK, Nutman TB (2000) IL-12p70 production by *Leishmania* major-harboring human dendritic cells is a CD40/CD40 ligand-dependent process. *J Immunol* 164: 5858–5865.
- Ato M, Stager S, Engwerda CR, Kaye PM (2002) Defective CCR7 expression on dendritic cells contributes to the development of visceral leishmaniasis. *Nat Immunol* 3: 1185–1191.
- Donovan MJ, Jayakumar A, McDowell MA (2007) Inhibition of groups 1 and 2 CD1 molecules on human dendritic cells by *Leishmania* species. *Parasite Immunol* 29: 515–524.
- Cai J, Huang ZZ, Lu SC (1997) Differential regulation of gamma-glutamylcysteine synthetase heavy and light subunit gene expression. *Biochem J* 326: 167–172.
- Qi H, Popov V, Soong L (2001) *Leishmania amazonensis*-dendritic cell interactions *in vitro* and the priming of parasite-specific CD4(+) T cells *in vivo*. *J Immunol* 167: 4534–4542.
- Murphy ML, Wille U, Villegas EN, Hunter CA, Farrell JP (2001) IL-10 mediates susceptibility to *Leishmania donovani* infection. *Eur J Immunol* 31: 2848–2856.
- Murray HW, Lu CM, Mauze S, Freeman S, Moreira AL, et al. (2002) Interleukin-10 (IL-10) in experimental visceral leishmaniasis and IL-10 receptor blockade as immunotherapy. *Infect Immun* 70: 6284–6293.
- Dobrovolskaia MA, Medvedev AE, Thomas KE, Cuesta N, Toshchakov V, et al. (2003) Induction of *in vitro* reprogramming by Toll-like receptor (TLR)2 and TLR4 agonists in murine macrophages: effects of TLR “homotolerance” versus “heterotolerance” on NF-kappaB signaling pathway components. *J Immunol* 170: 508–519.
- Whiteside ST, Epinat JC, Rice NR, Israel A (1997) IkappaB epsilon, a novel member of the IkappaB family, controls RelA and cRel NF-kappaB activity. *EMBO J* 16: 1413–1426.
- Kearns JD, Basak S, Werner SL, Huang CS, Hoffmann A (2006) IkappaB epsilon provides negative feedback to control NF-kappaB oscillations, signaling dynamics, and inflammatory gene expression. *J Cell Biol* 173: 659–664.
- Laskov R, Berger N, Horwitz MS (2005) Differential effects of tumor necrosis factor-alpha and CD40L on NF-kappaB inhibitory proteins IkappaB alpha, beta and epsilon and on the induction of the Jun amino-terminal kinase pathway in Ramos Burkitt lymphoma cells. *Eur Cytokine Netw* 16: 267–276.
- Zhao C, Cantin R, Breton M, Papadopoulos B, Tremblay MJ (2005) DC-SIGN-mediated transfer of HIV-1 is compromised by the ability of *Leishmania* infantum to exploit DC-SIGN as a ligand. *J Infect Dis* 191: 1665–1669.
- Pepe M, Altamura M, Spinelli R, Calvillo R, Saccia M, et al. (2006) Toll-like receptor-positive cells and recognition of pathogens: how human myeloid dendritic cells respond to *in vitro* infection with *Leishmania* infantum. *Curr Pharm Des* 12: 4255–4262.
- Garg R, Barat C, Ouellet M, Lodge R, Tremblay MJ (2009) *Leishmania* infantum Amastigotes Enhance HIV-1 Production in Cocultures of Human



- Dendritic Cells and CD4 T Cells by Inducing Secretion of IL-6 and TNF- $\alpha$ . *PLoS Negl Trop Dis* 3: e441.
43. Chulay JD, Fleckenstein L, Smith DH (1988) Pharmacokinetics of antimony during treatment of visceral leishmaniasis with sodium stibogluconate or meglumine antimoniate. *Trans R Soc Trop Med Hyg* 82: 69–72.
  44. Singh R, Kumar D, Ramesh V, Negi NS, Singh S, et al. (2006) Visceral leishmaniasis, or kala azar (KA): high incidence of refractoriness to antimony is contributed by anthroponotic transmission via post-KA dermal leishmaniasis. *J Infect Dis* 194: 302–306.
  45. Singh N, Singh RT, Sundar S (2003) Novel mechanism of drug resistance in kala azar field isolates. *J Infect Dis* 188: 600–607.
  46. Cuevas B, Lu Y, Watt S, Kumar R, Zhang J, et al. (1999) SHP-1 regulates Lck-induced phosphatidylinositol 3-kinase phosphorylation and activity. *J Biol Chem* 274: 27583–27589.
  47. Pathak MK, Yi T (2001) Sodium stibogluconate is a potent inhibitor of protein tyrosine phosphatases and augments cytokine responses in hemopoietic cell lines. *J Immunol* 167: 3391–3397.
  48. Corinti S, Albanesi C, la Sala A, Pastore S, Girolomoni G (2001) Regulatory activity of autocrine IL-10 on dendritic cell functions. *J Immunol* 166: 4312–4318.
  49. Kothari H, Kumar P, Sundar S, Singh N (2007) Possibility of membrane modification as a mechanism of antimony resistance in *Leishmania donovani*. *Parasitol Int* 56: 77–80.
  50. Samant M, Sahasrabudhe AA, Singh N, Gupta SK, Sundar S, et al. (2007) Proteophosphoglycan is differentially expressed in sodium stibogluconate-sensitive and resistant Indian clinical isolates of *Leishmania donovani*. *Parasitology* 134: 1175–1184.
  51. Kumar A, Boggula VR, Sundar S, Shasany AK, Dube A (2009) Identification of genetic markers in sodium antimony gluconate (SAG) sensitive and resistant Indian clinical isolates of *Leishmania donovani* through amplified fragment length polymorphism (AFLP). *Acta Trop* 110: 80–85.
  52. Mollah ZU, Pai S, Moore C, O'Sullivan BJ, Harrison MJ, et al. (2008) Abnormal NF- $\kappa$ B function characterizes human type 1 diabetes dendritic cells and monocytes. *J Immunol* 180: 3166–3175.
  53. Thakur CP, Thakur S, Narayan S, Sinha A (2008) Comparison of treatment regimens of kala-azar based on culture & sensitivity of amastigotes to sodium antimony gluconate. *Indian J Med Res* 127: 582–588.
  54. Ameen M (2009) Cutaneous leishmaniasis: disease susceptibility and pharmacogenetic implications. *Pharmacogenomics* 10: 451–461.
  55. Mukhopadhyay R, Madhubala R (1994) Antileishmanial activity and modification of hepatic xenobiotic metabolizing enzymes in golden hamster by 2(3)-tert-butyl-4-hydroxyanisole following infection with *Leishmania donovani*. *Biochem Pharmacol* 47: 253–256.
  56. Basu R, Bhaumik S, Basu JM, Naskar K, De T, et al. (2005) Kinetoplastid membrane protein-11 DNA vaccination induces complete protection against both pentavalent antimonial-sensitive and -resistant strains of *Leishmania donovani* that correlates with inducible nitric oxide synthase activity and IL-4 generation: evidence for mixed Th1- and Th2-like responses in visceral leishmaniasis. *J Immunol* 174: 7160–7171.
  57. Singh N, Almeida R, Kothari H, Kumar P, Mandal G, et al. (2007) Differential gene expression analysis in antimony-unresponsive Indian kala azar (visceral leishmaniasis) clinical isolates by DNA microarray. *Parasitology* 134: 777–787.
  58. Hart DT, Vickerman K, Coombs GH (1981) A quick, simple method for purifying *Leishmania mexicana* amastigotes in large numbers. *Parasitology* 82: 345–355.
  59. Chakraborty D, Banerjee S, Sen A, Banerjee KK, Das P, et al. (2005) *Leishmania donovani* affects antigen presentation of macrophage by disrupting lipid rafts. *J Immunol* 175: 3214–3224.
  60. Dube A, Singh N, Sundar S (2005) Refractoriness to the treatment of sodium stibogluconate in Indian kala-azar field isolates persist in vitro and in vivo experimental models. *Parasitol Res* 96: 216–223.
  61. Beg AA, Finco TS, Nantermet PV, Baldwin AS, Jr. (1993) Tumor necrosis factor and interleukin-1 lead to phosphorylation and loss of I $\kappa$ B $\alpha$ : a mechanism for NF- $\kappa$ B activation. *Mol Cell Biol* 13: 3301–3310.
  62. Murphy TL, Cleveland MG, Kulesza P, Magram J, Murphy KM (1995) Regulation of interleukin 12 p40 expression through an NF- $\kappa$ B half-site. *Mol Cell Biol* 15: 5258–5267.
  63. Lee CH, Melchers M, Wang H, Torrey TA, Slota R, et al. (2006) Regulation of the germinal center gene program by interferon (IFN) regulatory factor 8/IFN consensus sequence-binding protein. *J Exp Med* 203: 63–72.
  64. Schmid JA, Birbach A, Hofer-Warbinek R, Pengg M, Burner U, et al. (2000) Dynamics of NF- $\kappa$ B and I $\kappa$ B $\alpha$  studied with green fluorescent protein (GFP) fusion proteins. Investigation of GFP-p65 binding to DNA by fluorescence resonance energy transfer. *J Biol Chem* 275: 17035–17042.
  65. Judge AR, Koncarevic A, Hunter RB, Liou HC, Jackman RW, et al. (2007) Role for I $\kappa$ B $\alpha$ , but not c-Rel, in skeletal muscle atrophy. *Am J Physiol Cell Physiol* 292: C372–382.
